# Supplementary material for: Inferring the Clonal Structure of Viral Populations from Time Series Sequencing
Source: PLoS Comput Biol. 2015 Nov 16;11(11):e1004344. doi: 10.1371/journal.pcbi.1004344 (PMC4646700; doi:10.1371/journal.pcbi.1004344)
Supplement: S4 Data — (XLSX) [file pcbi.1004344.s004.xlsx]

## Sheet: S1
	###################
	SUMMARY
	####################
		Number of Supernetworks :1
		Minimum number of breakpoints :0
		Number of distinct haplotypes : 4
	1)) MUTATIONS
	************************************
	************************************
	No	Mutants	Sample_1	Sample_2	Sample_3	Sample_4	Sample_5	Sample_6	Sample_7	Sample_8	Sample_9	Sample_10	Sample_11	Sample_12	Sample_13	Sample_14	Sample_15	Sample_16	Max Prevalence
	1	S1_303	0.0103049	0.019956	0.0249398	0.0264905	0.0308943	0.0332926	0.00889567	0.010522	0.0195127	0.0310352	0.0125228	0.0176553	0.00984925	0.00946319	0.014755	0.118414	0.118414
	2	S1_1497	0.0427784	0.0690106	0.0472894	0.0160503	0.0404451	0.0271399	0.0223909	0.0820303	0.0200109	0.010102	0.0320331	0.122748	0.127177	0.661599	0.0631633	0.00638821	0.661599
	3	S1_1787	0.00421447	0.00572289	0.0043082	0.011489	0.0197205	0.0124193	0.00241051	0.00287356	0.00770825	0.00350002	0.00439477	0.0080318	0.00391262	0.00323924	0.00514258	0.130545	0.130545
	2)) Clusters
	************************************
	************************************
	No	Name	No mutations	No subnetworks
	1	S1_303G	1	1
	2	S1_1497C	1	1
	3	S1_1787T	1	1
	3)) DISTINCT HAPLOTYPES
	************************************
	************************************
	No	Short form	Long form	No occurences	Percent Occurencence
	1	C000		1	100
	2	C001	S1_1787	1	100
	3	C010	S1_1497	1	100
	4	C100	S1_303	1	100
	4)) Haplotypes Tables
	************************************
	************************************
	>S1_303G
		Clones	S1_303	Sample 1	Sample 2	Sample 3	Sample 4	Sample 5	Sample 6	Sample 7	Sample 8	Sample 9	Sample 10	Sample 11	Sample 12	Sample 13	Sample 14	Sample 15	Sample 16	Type
		C0	0	18536	16943	12550	16721	9536	14228	15598	16833	17587	24946	17900	13298	4926	17585	38929	6157	Real
		C1	1	193	345	321	455	304	490	140	179	350	799	227	239	49	168	583	827	Real
	>S1_1497C
		Clones	S1_1497	Sample 1	Sample 2	Sample 3	Sample 4	Sample 5	Sample 6	Sample 7	Sample 8	Sample 9	Sample 10	Sample 11	Sample 12	Sample 13	Sample 14	Sample 15	Sample 16	Type
		C0	0	21347	15649	11423	13303	5433	8388	17770	19785	16112	19598	18735	11442	5113	7613	43517	6066	Real
		C1	1	954	1160	567	217	229	234	407	1768	329	200	620	1601	745	14884	2934	39	Real
	>S1_1787T
		Clones	S1_1787	Sample 1	Sample 2	Sample 3	Sample 4	Sample 5	Sample 6	Sample 7	Sample 8	Sample 9	Sample 10	Sample 11	Sample 12	Sample 13	Sample 14	Sample 15	Sample 16	Type
		C0	0	21265	16505	12018	13078	6313	9940	16554	19085	15319	20784	18350	12227	6110	19386	38691	6174	Real
		C1	1	90	95	52	152	127	125	40	55	119	73	81	99	24	63	200	927	Real
	5)) DISTINCT RETICULATIONS
	************************************
	************************************
	No	Ret_cloneA	ret_CloneB	Reticulation	Min Breakpoints	Supernetworks
	6)) Clones sets
	************************************
	************************************
	No	Set of clones	No Supernetworks	Likelihood	Sample likelihood		Prevalences Sample 1	Prevalences Sample 2	Prevalences Sample 3	Prevalences Sample 4	Prevalences Sample 5	Prevalences Sample 6	Prevalences Sample 7	Prevalences Sample 8	Prevalences Sample 9	Prevalences Sample 10	Prevalences Sample 11	Prevalences Sample 12	Prevalences Sample 13	Prevalences Sample 14	Prevalences Sample 15	Prevalences Sample 16
	1	C000 C001 C010 C100	1	-194238	[0.9427 0.9427] [0.004214 0.004214] [0.04278 0.04278] [0.0103 0.0103]	[0.9053 0.9053] [0.005723 0.005723] [0.06901 0.06901] [0.01996 0.01996]	[0.9235 0.9235] [0.004308 0.004308] [0.04729 0.04729] [0.02494 0.02494]	[0.946 0.946] [0.01149 0.01149] [0.01605 0.01605] [0.02649 0.02649]	[0.9089 0.9089] [0.01972 0.01972] [0.04045 0.04045] [0.03089 0.03089]	[0.9271 0.9271] [0.01242 0.01242] [0.02714 0.02714] [0.03329 0.03329]	[0.9663 0.9663] [0.002411 0.002411] [0.02239 0.02239] [0.008896 0.008896]	[0.9046 0.9046] [0.002874 0.002874] [0.08203 0.08203] [0.01052 0.01052]	[0.9528 0.9528] [0.007708 0.007708] [0.02001 0.02001] [0.01951 0.01951]	[0.9554 0.9554] [0.0035 0.0035] [0.0101 0.0101] [0.03104 0.03104]	[0.951 0.951] [0.004395 0.004395] [0.03203 0.03203] [0.01252 0.01252]	[0.8516 0.8516] [0.008032 0.008032] [0.1227 0.1227] [0.01766 0.01766]	[0.8591 0.8591] [0.003913 0.003913] [0.1272 0.1272] [0.009849 0.009849]	[0.3257 0.3257] [0.003239 0.003239] [0.6616 0.6616] [0.009463 0.009463]	[0.9169 0.9169] [0.005143 0.005143] [0.06316 0.06316] [0.01476 0.01476]	[0.7447 0.7447] [0.1305 0.1305] [0.006388 0.006388] [0.1184 0.1184]
	7)) SUPERNETSORKS' ESTIMATED PREVALENCES PER HAPLOTYPES
	************************************
	************************************
	Supernetwork	Clones' sets	C000	C001	C010	C100
	SN 1	Setclone 1	[0.9427 0.9427][0.9053 0.9053][0.9235 0.9235][0.946 0.946][0.9089 0.9089][0.9271 0.9271][0.9663 0.9663][0.9046 0.9046][0.9528 0.9528][0.9554 0.9554][0.951 0.951][0.8516 0.8516][0.8591 0.8591][0.3257 0.3257][0.9169 0.9169][0.7447 0.7447][0.004214 0.004214][0.005723 0.005723][0.004308 0.004308][0.01149 0.01149][0.01972 0.01972][0.01242 0.01242][0.002411 0.002411][0.002874 0.002874][0.007708 0.00770…

## Sheet: S2
	###################
	SUMMARY
	####################
		Number of Supernetworks :5
		Minimum number of breakpoints :1
		Number of distinct haplotypes : 9
	1)) MUTATIONS
	************************************
	************************************
	No	Mutants	Sample_1	Sample_2	Sample_3	Sample_4	Sample_5	Sample_6	Sample_7	Sample_8	Sample_9	Sample_10	Sample_11	Sample_12	Sample_13	Sample_14	Sample_15	Sample_16	Max Prevalence
	1	S2_384	0.00482546	0.00731801	0.00762735	0.00987078	0.00923198	0.00847458	0.0057658	0.0106449	0.00684192	0.181799	0.00721682	0.0625322	0.00606061	0.00573988	0.00788657	0.00550328	0.181799
	2	S2_501	0.0198441	0.00798929	0.0034847	0.00534006	0.00486741	0.0075545	0.4494	0.00466732	0.00532646	0.00424902	0.00494071	0.0054246	0.00407332	0.00400428	0.00517915	0.00552632	0.4494
	3	S2_1500	0.00299161	0.00358566	0.00277708	0.00259248	0.00423841	0.00263896	0.00196356	0.00400534	0.00360848	0.00378235	0.063225	0.1813	0.018442	0.00338859	0.763323	0.0479916	0.763323
	4	S2_1626	0.00343315	0.00305196	0.00266934	0.00300471	0.00365513	0.00225957	0.00223244	0.00180234	0.00283239	0.0030587	0.0155537	0.0276598	0.0319847	0.234442	0.00967444	0.0058651	0.234442
	5	S2_1776	0.00618194	0.00645882	0.00301659	0.00788744	0.00873722	0.00688572	0.00284166	0.004641	0.237488	0.00694254	0.00340554	0.0053127	0.00197433	0.00271635	0.00368554	0.00458148	0.237488
	6	S2_1978	0.00724344	0.00937054	0.00872818	0.00950954	0.00962207	0.0107597	0.00220838	0.0195204	0.00520761	0.17283	0.00724373	0.00538383	0.00422498	0.00239608	0.00378458	0.00500321	0.17283
	7	S2_2037	0.343867	0.144283	0.0807249	0.563369	0.334515	0.194961	0.0661269	0.197497	0.201988	0.13911	0.220195	0.0684826	0.0305292	0.0060245	0.22206	0.0736411	0.563369
	2)) Clusters
	************************************
	************************************
	No	Name	No mutations	No subnetworks
	1	S2_1500T	1	1
	2	S2_1626C	1	1
	3	S2_1776A	1	1
	4	S2_1978G	1	1
	5	S2_2037A	1	1
	6	S2_384T	1	1
	7	S2_501C	1	1
	8	S2_1500T_2037A	2	3
	9	S2_1500T_1978G	2	1
	10	S2_384T_501C	2	1
	11	S2_1500T_1776A	2	1
	12	S2_1500T_1626C	2	1
	13	S2_1626C_2037A	2	1
	14	S2_1626C_1978G	2	1
	15	S2_1626C_1776A	2	1
	16	S2_1776A_2037A	2	1
	17	S2_1776A_1978G	2	1
	18	S2_1978G_2037A	2	1
	19	S2_1776A_1978G_2037A	3	1
	20	S2_1626C_1978G_2037A	3	1
	3)) DISTINCT HAPLOTYPES
	************************************
	************************************
	No	Short form	Long form	No occurences	Percent Occurencence
	1	C0000000		5	100
	2	C0000001	S2_2037	5	100
	3	C0000010	S2_1978	5	100
	4	C0000100	S2_1776	5	100
	5	C0001000	S2_1626	5	100
	6	C0010000	S2_1500	5	100
	7	C0010001	S2_1500-S2_2037	5	100
	8	C0100000	S2_501	5	100
	9	C1000000	S2_384	5	100
	4)) Haplotypes Tables
	************************************
	************************************
	>S2_1500T
		Clones	S2_1500	Sample 1	Sample 2	Sample 3	Sample 4	Sample 5	Sample 6	Sample 7	Sample 8	Sample 9	Sample 10	Sample 11	Sample 12	Sample 13	Sample 14	Sample 15	Sample 16	Type
		C0	0	13664	22509	7900	10003	3759	6047	12707	8952	11045	18437	14698	7907	3087	19117	7390	6328	Real
		C1	1	41	81	22	26	16	16	25	36	40	70	992	1751	58	65	23834	319	Real
	>S2_1626C
		Clones	S2_1626	Sample 1	Sample 2	Sample 3	Sample 4	Sample 5	Sample 6	Sample 7	Sample 8	Sample 9	Sample 10	Sample 11	Sample 12	Sample 13	Sample 14	Sample 15	Sample 16	Type
		C0	0	15675	25806	8967	12277	4634	7065	14749	9969	11970	20534	16836	9843	3541	20298	31119	7458	Real
		C1	1	54	79	24	37	17	16	33	18	34	63	266	280	117	6216	304	44	Real
	>S2_1776A
		Clones	S2_1776	Sample 1	Sample 2	Sample 3	Sample 4	Sample 5	Sample 6	Sample 7	Sample 8	Sample 9	Sample 10	Sample 11	Sample 12	Sample 13	Sample 14	Sample 15	Sample 16	Type
		C0	0	17523	28458	9254	13962	6013	8221	15089	10938	12265	21742	17851	10672	4044	23497	33521	8039	Real
		C1	1	109	185	28	111	53	57	43	51	3820	152	61	57	8	64	124	37	Real
	>S2_1978G
		Clones	S2_1978	Sample 1	Sample 2	Sample 3	Sample 4	Sample 5	Sample 6	Sample 7	Sample 8	Sample 9	Sample 10	Sample 11	Sample 12	Sample 13	Sample 14	Sample 15	Sample 16	Type
		C0	0	17132	28438	10335	19165	8543	10573	12651	9895	14327	22322	16309	10715	3771	19152	33167	7756	Real
		C1	1	125	269	91	184	83	115	28	197	75	4664	119	58	16	46	126	39	Real
	>S2_2037A
		Clones	S2_2037	Sample 1	Sample 2	Sample 3	Sample 4	Sample 5	Sample 6	Sample 7	Sample 8	Sample 9	Sample 10	Sample 11	Sample 12	Sample 13	Sample 14	Sample 15	Sample 16	Type
		C0	0	10298	22727	8928	8010	5443	8180	8996	6798	9956	21134	11414	8447	2858	14849	22929	6101	Real
		C1	1	5397	3832	784	10335	2736	1981	637	1673	2520	3415	3223	621	90	90	6545	485	Real
	>S2_384T
		Clones	S2_384	Sample 1	Sample 2	Sample 3	Sample 4	Sample 5	Sample 6	Sample 7	Sample 8	Sample 9	Sample 10	Sample 11	Sample 12	Sample 13	Sample 14	Sample 15	Sample 16	Type
		C0	0	9693	18177	7286	11034	5044	7605	9484	6413	8274	15293	12656	7271	2460	15763	23021	5602	Real
		C1	1	47	134	56	110	47	65	55	69	57	3398	92	485	15	91	183	31	Real
	>S2_501C
		Clones	S2_501	Sample 1	Sample 2	Sample 3	Sample 4	Sample 5	Sample 6	Sample 7	Sample 8	Sample 9	Sample 10	Sample 11	Sample 12	Sample 13	Sample 14	Sample 15	Sample 16	Type
		C0	0	13830	24461	9151	13411	5929	9196	13591	9170	11578	20857	17119	10084	3423	21391	30541	7558	Real
		C1	1	280	197	32	72	29	70	11093	43	62	89	85	55	14	86	159	42	Real
	>S2_1500T_2037A
		Clones	S2_1500	S2_2037	Sample 1	Sample 2	Sample 3	Sample 4	Sample 5	Sample 6	Sample 7	Sample 8	Sample 9	Sample 10	Sample 11	Sample 12	Sample 13	Sample 14	Sample 15	Sample 16	Type
		C00	0	0	240	556	125	148	93	105	298	177	187	236	247	108	52	355	128	91	Real
		C01	0	1	191	105	27	262	52	32	40	64	68	70	118	15	3	3	101	5	Real
		C10	1	0	2	2	0	0	1	0	1	1	0	0	13	27	0	1	538	3	Real
		C11	1	1	0	1	0	0	1	1	0	0	0	0	10	2	0	0	147	2	Real
	>S2_1500T_1978G
		Clones	S2_1500	S2_1978	Sample 1	Sample 2	Sample 3	Sample 4	Sample 5	Sample 6	Sample 7	Sample 8	Sample 9	Sample 10	Sample 11	Sample 12	Sample 13	Sample 14	Sample 15	Sample 16	Type
		C00	0	0	622	927	256	574	219	205	545	339	396	431	533	223	110	601	290	162	Real
		C01	0	1	1	2	0	0	1	1	2	6	0	61	1	0	0	0	0	0	Real
		C10	1	0	4	5	0	0	2	2	1	3	0	0	34	64	2	2	967	9	Real
		C11	1	1	1	0	0	0	0	0	0	0	0	0	0	0	0	0	2	0	Artifact
	>S2_384T_501C
		Clones	S2_384	S2_501	Sample 1	Sample 2	Sample 3	Sample 4	Sample 5	Sample 6	Sample 7	Sample 8	Sample 9	Sample 10	Sample 11	Sample 12	Sample 13	Sample 14	Sample 15	Sample 16	Type
		C00	0	0	1493	2502	813	1061	467	999	780	913	1154	2232	1923	991	340	2063	3114	926	Real
		C01	0	1	36	9	0	2	0	4	816	3	3	1	3	1	0	3	5	1	Real
		C10	1	0	4	11	4	10	2	2	4	11	6	605	7	77	1	11	23	5	Real
		C11	1	1	0	0	0	0	0	0	4	0	0	0	0	1	0	0	0	0	Artifact
	>S2_1500T_1776A
		Clones	S2_1500	S2_1776	Sample 1	Sample 2	Sample 3	Sample 4	Sample 5	Sample 6	Sample 7	Sample 8	Sample 9	Sample 10	Sample 11	Sample 12	Sample 13	Sample 14	Sample 15	Sample 16	Type
		C00	0	0	1187	1867	864	896	384	497	1167	722	807	1665	1314	711	270	1687	681	478	Real
		C01	0	1	1	0	0	1	0	1	3	0	303	0	0	0	0	2	0	0	Real
		C10	1	0	4	5	1	0	2	0	2	1	1	7	87	158	2	5	2398	29	Real
	>S2_1500T_1626C
		Clones	S2_1500	S2_1626	Sample 1	Sample 2	Sample 3	Sample 4	Sample 5	Sample 6	Sample 7	Sample 8	Sample 9	Sample 10	Sample 11	Sample 12	Sample 13	Sample 14	Sample 15	Sample 16	Type
		C00	0	0	1790	2704	978	1168	371	768	1244	1186	1453	3056	1996	1049	335	1987	974	938	Real
		C01	0	1	2	0	0	0	0	0	0	0	1	1	29	28	14	690	4	2	Real
		C10	1	0	3	8	2	4	1	4	1	5	5	9	168	246	8	3	3300	50	Real
		C11	1	1	0	0	0	0	0	0	0	0	0	0	1	2	0	1	28	0	Artifact
	>S2_1626C_2037A
		Clones	S2_1626	S2_2037	Sample 1	Sample 2	Sample 3	Sample 4	Sample 5	Sample 6	Sample 7	Sample 8	Sample 9	Sample 10	Sample 11	Sample 12	Sample 13	Sample 14	Sample 15	Sample 16	Type
		C00	0	0	431	888	278	297	171	211	577	288	346	489	498	321	93	798	1023	187	Real
		C01	0	1	341	184	53	531	92	84	60	104	145	162	203	27	4	4	344	25	Real
		C10	1	0	2	2	0	0	0	0	3	0	0	1	2	3	1	144	7	0	Real
		C11	1	1	0	0	0	0	0	0	0	0	0	0	3	0	0	2	0	0	Artifact
	>S2_1626C_1978G
		Clones	S2_1626	S2_1978	Sample 1	Sample 2	Sample 3	Sample 4	Sample 5	Sample 6	Sample 7	Sample 8	Sample 9	Sample 10	Sample 11	Sample 12	Sample 13	Sample 14	Sample 15	Sample 16	Type
		C00	0	0	1091	1596	513	1043	383	461	982	573	748	930	1030	528	179	1250	1983	331	Real
		C01	0	1	3	5	0	4	1	0	0	6	0	118	1	1	0	1	3	0	Real
		C10	1	0	2	1	0	0	0	0	2	0	0	0	10	4	1	254	7	1	Real
	>S2_1626C_1776A
		Clones	S2_1626	S2_1776	Sample 1	Sample 2	Sample 3	Sample 4	Sample 5	Sample 6	Sample 7	Sample 8	Sample 9	Sample 10	Sample 11	Sample 12	Sample 13	Sample 14	Sample 15	Sample 16	Type
		C00	0	0	1978	2897	1087	1170	475	866	1561	1245	1234	2777	2247	1226	456	2608	3831	1004	Real
		C01	0	1	7	1	0	1	0	2	1	0	441	3	1	1	0	3	3	2	Real
		C10	1	0	3	1	0	0	0	0	0	0	1	1	31	30	7	626	23	2	Real
		C11	1	1	0	0	0	0	0	0	0	0	1	0	0	0	0	0	0	0	Artifact
	>S2_1776A_2037A
		Clones	S2_1776	S2_2037	Sample 1	Sample 2	Sample 3	Sample 4	Sample 5	Sample 6	Sample 7	Sample 8	Sample 9	Sample 10	Sample 11	Sample 12	Sample 13	Sample 14	Sample 15	Sample 16	Type
		C00	0	0	1068	2023	802	743	488	608	1251	688	850	1554	1251	828	331	1861	2415	517	Real
		C01	0	1	716	361	109	1136	291	236	113	228	268	407	434	92	15	11	862	70	Real
		C10	1	0	2	2	0	3	1	0	0	0	249	1	0	0	0	4	0	0	Real
		C11	1	1	2	4	0	7	3	2	0	0	78	0	0	1	0	0	3	0	Artifact
	>S2_1776A_1978G
		Clones	S2_1776	S2_1978	Sample 1	Sample 2	Sample 3	Sample 4	Sample 5	Sample 6	Sample 7	Sample 8	Sample 9	Sample 10	Sample 11	Sample 12	Sample 13	Sample 14	Sample 15	Sample 16	Type
		C00	0	0	2399	3294	1276	2404	1027	1242	1953	1331	1611	2482	2367	1313	550	2706	4459	907	Real
		C01	0	1	8	12	3	12	0	4	0	18	2	454	8	1	0	1	3	0	Real
		C10	1	0	3	3	0	3	2	0	1	3	465	1	0	1	0	4	2	1	Real
		C11	1	1	0	0	0	0	0	0	0	0	1	1	0	0	0	0	1	0	Artifact
	>S2_1978G_2037A
		Clones	S2_1978	S2_2037	Sample 1	Sample 2	Sample 3	Sample 4	Sample 5	Sample 6	Sample 7	Sample 8	Sample 9	Sample 10	Sample 11	Sample 12	Sample 13	Sample 14	Sample 15	Sample 16	Type
		C00	0	0	6141	12493	4652	4619	3004	4471	5339	4077	5906	9721	6481	4918	1728	8809	13443	3613	Real
		C01	0	1	4070	2388	519	6924	1819	1422	527	1281	1923	2124	2309	466	73	62	4757	358	Real
		C10	1	0	52	86	26	52	31	37	5	85	18	2315	48	18	4	12	28	11	Real
		C11	1	1	17	17	5	26	8	10	5	19	8	186	10	2	2	0	12	2	Artifact
	>S2_1776A_1978G_2037A
		Clones	S2_1776	S2_1978	S2_2037	Sample 1	Sample 2	Sample 3	Sample 4	Sample 5	Sample 6	Sample 7	Sample 8	Sample 9	Sample 10	Sample 11	Sample 12	Sample 13	Sample 14	Sample 15	Sample 16	Type
		C000	0	0	0	727	1220	510	564	353	426	741	442	567	801	767	504	220	1081	1506	320	Real
		C001	0	0	1	621	314	93	876	255	206	107	205	239	312	388	88	15	11	736	63	Real
		C010	0	1	0	2	3	2	4	0	0	0	5	1	140	3	0	0	0	1	0	Real
		C011	0	1	1	3	0	0	3	0	0	0	4	0	32	1	0	0	0	0	0	Artifact
		C100	1	0	0	1	1	0	0	1	0	0	0	168	0	0	0	0	3	0	0	Real
		C101	1	0	1	1	1	0	1	1	0	0	0	66	0	0	1	0	0	1	0	Artifact
		C111	1	1	1	0	0	0	0	0	0	0	0	0	0	0	0	0	0	1	0	Artifact
	>S2_1626C_1978G_2037A
		Clones	S2_1626	S2_1978	S2_2037	Sample 1	Sample 2	Sample 3	Sample 4	Sample 5	Sample 6	Sample 7	Sample 8	Sample 9	Sample 10	Sample 11	Sample 12	Sample 13	Sample 14	Sample 15	Sample 16	Type
		C000	0	0	0	299	529	171	232	126	148	367	184	233	258	309	200	60	469	669	115	Real
		C001	0	0	1	313	171	49	438	81	80	57	95	137	145	185	25	4	4	299	21	Real
		C010	0	1	0	2	1	0	0	0	0	0	1	0	41	0	0	0	0	1	0	Real
		C011	0	1	1	0	0	0	3	0	0	0	2	0	4	0	0	0	0	1	0	Artifact
		C100	1	0	0	2	1	0	0	0	0	2	0	0	0	1	1	0	86	2	0	Real
		C101	1	0	1	0	0	0	0	0	0	0	0	0	0	3	0	0	2	0	0	Artifact
	5)) DISTINCT RETICULATIONS
	************************************
	************************************
	No	Ret_cloneA	ret_CloneB	Reticulation	Min Breakpoints	Supernetworks
	1	C0000001	C0010000	C0010001	1	1
	2	C0000000	C0010001	C0000001	1	2
	3	C0000000	C0010001	C0010000	1	3
	4	C0010001	C0100000	C0010000	1	4
	5	C0010001	C1000000	C0010000	1	5
	6)) Clones sets
	************************************
	************************************
	No	Set of clones	No Supernetworks	Likelihood	Sample likelihood		Prevalences Sample 1	Prevalences Sample 2	Prevalences Sample 3	Prevalences Sample 4	Prevalences Sample 5	Prevalences Sample 6	Prevalences Sample 7	Prevalences Sample 8	Prevalences Sample 9	Prevalences Sample 10	Prevalences Sample 11	Prevalences Sample 12	Prevalences Sample 13	Prevalences Sample 14	Prevalences Sample 15	Prevalences Sample 16
	1	C0000000 C0000001 C0000010 C0000100 C0001000 C0010000 C0010001 C0100000 C1000000	5	-763035	[0.6125 0.6125] [0.351 0.351] [0.00603 0.00603] [0.00485 0.00485] [1e-08 1e-08] [1e-08 1e-08] [0.002126 0.002126] [0.01922 0.01922] [0.004252 0.004252]	[0.8224 0.8224] [0.1429 0.1429] [0.007601 0.007601] [0.004887 0.004887] [0.00323 0.00323] [1e-08 1e-08] [0.002555 0.002555] [0.008502 0.008502] [0.007933 0.007933]	[0.8939 0.8939] [0.07896 0.07896] [0.00798 0.00798] [0.002206 0.002206] [0.002218 0.002218] [1e-06 1e-06] [0.003397 0.003397] [0.003541 0.003541] [0.007804 0.007804]	[0.4018 0.4018] [0.5627 0.5627] [0.007023 0.007023] [0.006179 0.006179] [0.002199 0.002199] [1e-08 1e-08] [0.003521 0.003521] [0.005854 0.005854] [0.01068 0.01068]	[0.6333 0.6333] [0.3458 0.3458] [1e-08 1e-08] [1e-08 1e-08] [1e-08 1e-08] [1e-08 1e-08] [0.002982 0.002982] [0.007581 0.007581] [0.01029 0.01029]	[0.7689 0.7689] [0.1989 0.1989] [0.007588 0.007588] [1e-08 1e-08] [0.00143 0.00143] [1e-08 1e-08] [0.009901 0.009901] [0.006491 0.006491] [0.006814 0.006814]	[0.4668 0.4668] [0.07534 0.07534] [0.001426 0.001426] [0.002147 0.002147] [1e-08 1e-08] [0.0005713 0.0005713] [0.001441 0.001441] [0.447 0.447] [0.005215 0.005215]	[0.7564 0.7564] [0.2113 0.2113] [0.01766 0.01766] [1e-08 1e-08] [1e-08 1e-08] [0.002054 0.002054] [0.001897 0.001897] [1e-08 1e-08] [0.0107 0.0107]	[0.5404 0.5404] [0.1991 0.1991] [0.004027 0.004027] [0.2376 0.2376] [0.002378 0.002378] [1e-08 1e-08] [0.003983 0.003983] [0.005443 0.005443] [0.007013 0.007013]	[0.4923 0.4923] [0.1369 0.1369] [0.1727 0.1727] [0.004979 0.004979] [0.00185 0.00185] [1e-08 1e-08] [0.004819 0.004819] [0.004045 0.004045] [0.1824 0.1824]	[0.7383 0.7383] [0.1652 0.1652] [1e-08 1e-08] [0.001796 0.001796] [0.01319 0.01319] [0.004897 0.004897] [0.06637 0.06637] [0.003999 0.003999] [0.006307 0.006307]	[0.7077 0.7077] [0.02758 0.02758] [0.003766 0.003766] [1e-08 1e-08] [0.02715 0.02715] [0.1127 0.1127] [0.05972 0.05972] [1e-08 1e-08] [0.06137 0.06137]	[0.9214 0.9214] [0.01429 0.01429] [0.002998 0.002998] [1e-08 1e-08] [0.03155 0.03155] [1e-08 1e-08] [0.01991 0.01991] [0.003839 0.003839] [0.006051 0.006051]	[0.7454 0.7454] [0.004343 0.004343] [1e-08 1e-08] [0.002176 0.002176] [0.2344 0.2344] [0.001145 0.001145] [0.002097 0.002097] [0.004167 0.004167] [0.006261 0.006261]	[0.1963 0.1963] [0.04062 0.04062] [1e-08 1e-08] [1e-08 1e-08] [1e-08 1e-08] [0.5597 0.5597] [0.2034 0.2034] [1e-08 1e-08] [1e-08 1e-08]	[0.8965 0.8965] [0.03032 0.03032] [0.003484 0.003484] [0.003373 0.003373] [0.00458 0.00458] [0.002687 0.002687] [0.04922 0.04922] [0.004738 0.004738] [0.005054 0.005054]
	7)) SUPERNETSORKS' ESTIMATED PREVALENCES PER HAPLOTYPES
	************************************
	************************************
	Supernetwork	Clones' sets	C0000000	C0000001	C0000010	C0000100	C0001000	C0010000	C0010001	C0100000	C1000000
	SN 1	Setclone 1	[0.6125 0.6125][0.8224 0.8224][0.8939 0.8939][0.4018 0.4018][0.6333 0.6333][0.7689 0.7689][0.4668 0.4668][0.7564 0.7564][0.5404 0.5404][0.4923 0.4923][0.7383 0.7383][0.7077 0.7077][0.9214 0.9214][0.7454 0.7454][0.1963 0.1963][0.8965 0.8965][0.351 0.351][0.1429 0.1429][0.07896 0.07896][0.5627 0.5627][0.3458 0.3458][0.1989 0.1989][0.07534 0.07534][0.2113 0.2113][0.1991 0.1991][0.1369 0.1369][0.1652…
	SN 2	Setclone 1	[0.6125 0.6125][0.8224 0.8224][0.8939 0.8939][0.4018 0.4018][0.6333 0.6333][0.7689 0.7689][0.4668 0.4668][0.7564 0.7564][0.5404 0.5404][0.4923 0.4923][0.7383 0.7383][0.7077 0.7077][0.9214 0.9214][0.7454 0.7454][0.1963 0.1963][0.8965 0.8965][0.351 0.351][0.1429 0.1429][0.07896 0.07896][0.5627 0.5627][0.3458 0.3458][0.1989 0.1989][0.07534 0.07534][0.2113 0.2113][0.1991 0.1991][0.1369 0.1369][0.1652…
	SN 3	Setclone 1	[0.6125 0.6125][0.8224 0.8224][0.8939 0.8939][0.4018 0.4018][0.6333 0.6333][0.7689 0.7689][0.4668 0.4668][0.7564 0.7564][0.5404 0.5404][0.4923 0.4923][0.7383 0.7383][0.7077 0.7077][0.9214 0.9214][0.7454 0.7454][0.1963 0.1963][0.8965 0.8965][0.351 0.351][0.1429 0.1429][0.07896 0.07896][0.5627 0.5627][0.3458 0.3458][0.1989 0.1989][0.07534 0.07534][0.2113 0.2113][0.1991 0.1991][0.1369 0.1369][0.1652…
	SN 4	Setclone 1	[0.6125 0.6125][0.8224 0.8224][0.8939 0.8939][0.4018 0.4018][0.6333 0.6333][0.7689 0.7689][0.4668 0.4668][0.7564 0.7564][0.5404 0.5404][0.4923 0.4923][0.7383 0.7383][0.7077 0.7077][0.9214 0.9214][0.7454 0.7454][0.1963 0.1963][0.8965 0.8965][0.351 0.351][0.1429 0.1429][0.07896 0.07896][0.5627 0.5627][0.3458 0.3458][0.1989 0.1989][0.07534 0.07534][0.2113 0.2113][0.1991 0.1991][0.1369 0.1369][0.1652…
	SN 5	Setclone 1	[0.6125 0.6125][0.8224 0.8224][0.8939 0.8939][0.4018 0.4018][0.6333 0.6333][0.7689 0.7689][0.4668 0.4668][0.7564 0.7564][0.5404 0.5404][0.4923 0.4923][0.7383 0.7383][0.7077 0.7077][0.9214 0.9214][0.7454 0.7454][0.1963 0.1963][0.8965 0.8965][0.351 0.351][0.1429 0.1429][0.07896 0.07896][0.5627 0.5627][0.3458 0.3458][0.1989 0.1989][0.07534 0.07534][0.2113 0.2113][0.1991 0.1991][0.1369 0.1369][0.1652…

## Sheet: S3
	###################
	SUMMARY
	####################
		Number of Supernetworks :1
		Minimum number of breakpoints :0
		Number of distinct haplotypes : 5
	1)) MUTATIONS
	************************************
	************************************
	No	Mutants	Sample_1	Sample_2	Sample_3	Sample_4	Sample_5	Sample_6	Sample_7	Sample_8	Sample_9	Sample_10	Sample_11	Sample_12	Sample_13	Sample_14	Sample_15	Sample_16	Max Prevalence
	1	S3_201	0.334393	0.0323669	0.154091	0.0477451	0.196914	0.381949	0.0627406	0.169453	0.088772	0.463795	0.348056	0.254907	0.0802367	0.0100735	0.0138873	0.015212	0.463795
	2	S3_768	0.0047552	0.00412396	0.00359497	0.00257342	0.00209996	0.00221506	0.00208333	0.00338101	0.208862	0.00360473	0.00267441	0.00313152	0.0022604	0.00188541	0.00260444	0.00209809	0.208862
	3	S3_825	0.00510345	0.00445779	0.0038624	0.00230108	0.00412044	0.00467914	0.00323762	0.00361011	0.00491688	0.00401139	0.0038274	0.00376762	0.00639731	0.00990099	0.00409975	0.761666	0.761666
	4	S3_1845	0.0071385	0.0105235	0.214019	0.0196239	0.0327644	0.0286304	0.00453712	0.00536161	0.0195296	0.0131943	0.0155239	0.016626	0.0101615	0.0053552	0.0136045	0.0127724	0.214019
	2)) Clusters
	************************************
	************************************
	No	Name	No mutations	No subnetworks
	1	S3_201C	1	1
	2	S3_768A	1	1
	3	S3_825C	1	1
	4	S3_1845A	1	1
	5	S3_201C_1845A	2	1
	6	S3_201C_825C	2	1
	7	S3_201C_768A	2	1
	8	S3_768A_825C	2	1
	3)) DISTINCT HAPLOTYPES
	************************************
	************************************
	No	Short form	Long form	No occurences	Percent Occurencence
	1	C0000		1	100
	2	C0001	S3_1845	1	100
	3	C0010	S3_825	1	100
	4	C0100	S3_768	1	100
	5	C1000	S3_201	1	100
	4)) Haplotypes Tables
	************************************
	************************************
	>S3_201C
		Clones	S3_201	Sample 1	Sample 2	Sample 3	Sample 4	Sample 5	Sample 6	Sample 7	Sample 8	Sample 9	Sample 10	Sample 11	Sample 12	Sample 13	Sample 14	Sample 15	Sample 16	Type
		C0	0	6489	17788	31346	30934	23577	18900	7305	5514	29460	17202	13713	25436	3886	9434	34084	10358	Real
		C1	1	3260	595	5710	1551	5781	11680	489	1125	2870	14879	7321	8702	339	96	480	160	Real
	>S3_768A
		Clones	S3_768	Sample 1	Sample 2	Sample 3	Sample 4	Sample 5	Sample 6	Sample 7	Sample 8	Sample 9	Sample 10	Sample 11	Sample 12	Sample 13	Sample 14	Sample 15	Sample 16	Type
		C0	0	11302	16421	6652	6589	2376	4955	8622	7664	5803	12715	13052	6685	2207	9529	19148	3805	Real
		C1	1	54	68	24	17	5	11	18	26	1532	46	35	21	5	18	50	8	Real
	>S3_825C
		Clones	S3_825	Sample 1	Sample 2	Sample 3	Sample 4	Sample 5	Sample 6	Sample 7	Sample 8	Sample 9	Sample 10	Sample 11	Sample 12	Sample 13	Sample 14	Sample 15	Sample 16	Type
		C0	0	14426	21216	8253	8238	3142	5956	11699	9936	8500	15394	16137	8197	2951	12400	23563	1190	Real
		C1	1	74	95	32	19	13	28	38	36	42	62	62	31	19	124	97	3803	Real
	>S3_1845A
		Clones	S3_1845	Sample 1	Sample 2	Sample 3	Sample 4	Sample 5	Sample 6	Sample 7	Sample 8	Sample 9	Sample 10	Sample 11	Sample 12	Sample 13	Sample 14	Sample 15	Sample 16	Type
		C0	0	11405	22566	11359	27577	19720	20221	10312	8348	30223	28869	18708	16916	3799	11887	33860	11053	Real
		C1	1	82	240	3093	552	668	596	47	45	602	386	295	286	39	64	467	143	Real
	>S3_201C_1845A
		Clones	S3_201	S3_1845	Sample 1	Sample 2	Sample 3	Sample 4	Sample 5	Sample 6	Sample 7	Sample 8	Sample 9	Sample 10	Sample 11	Sample 12	Sample 13	Sample 14	Sample 15	Sample 16	Type
		C00	0	0	96	632	837	3547	2666	1976	89	46	3088	1474	1000	1807	242	234	2730	991	Real
		C01	0	1	1	8	394	34	59	32	1	0	47	9	63	27	4	1	18	8	Real
		C10	1	0	24	10	214	94	413	1032	2	3	355	1330	318	386	12	0	13	1	Real
		C11	1	1	1	6	26	18	17	33	0	0	37	13	8	16	2	0	20	4	Artifact
	>S3_201C_825C
		Clones	S3_201	S3_825	Sample 1	Sample 2	Sample 3	Sample 4	Sample 5	Sample 6	Sample 7	Sample 8	Sample 9	Sample 10	Sample 11	Sample 12	Sample 13	Sample 14	Sample 15	Sample 16	Type
		C00	0	0	265	759	158	228	87	114	450	284	142	195	260	134	121	407	648	21	Real
		C01	0	1	1	1	0	0	0	0	1	1	0	0	0	0	0	2	2	64	Real
		C10	1	0	123	15	80	9	15	64	28	36	9	72	186	38	7	0	1	0	Real
	>S3_201C_768A
		Clones	S3_201	S3_768	Sample 1	Sample 2	Sample 3	Sample 4	Sample 5	Sample 6	Sample 7	Sample 8	Sample 9	Sample 10	Sample 11	Sample 12	Sample 13	Sample 14	Sample 15	Sample 16	Type
		C00	0	0	235	547	143	210	87	100	326	209	146	191	245	145	94	309	647	91	Real
		C01	0	1	1	0	1	0	0	0	1	1	31	0	0	1	0	0	0	0	Real
		C10	1	0	80	8	83	11	12	59	22	32	12	81	175	39	6	0	0	0	Real
		C11	1	1	0	0	0	0	0	0	0	0	1	0	0	0	0	0	0	0	Artifact
	>S3_768A_825C
		Clones	S3_768	S3_825	Sample 1	Sample 2	Sample 3	Sample 4	Sample 5	Sample 6	Sample 7	Sample 8	Sample 9	Sample 10	Sample 11	Sample 12	Sample 13	Sample 14	Sample 15	Sample 16	Type
		C00	0	0	5296	7935	2865	2885	1027	2256	3856	3647	2550	5760	5933	2869	1003	4346	8479	470	Real
		C01	0	1	27	32	11	9	6	8	18	17	18	22	21	9	6	52	32	1356	Real
		C10	1	0	14	22	10	5	2	6	5	8	706	18	12	6	1	10	17	3	Real
		C11	1	1	2	4	0	1	0	0	1	0	2	3	3	1	0	1	2	1	Artifact
	5)) DISTINCT RETICULATIONS
	************************************
	************************************
	No	Ret_cloneA	ret_CloneB	Reticulation	Min Breakpoints	Supernetworks
	6)) Clones sets
	************************************
	************************************
	No	Set of clones	No Supernetworks	Likelihood	Sample likelihood		Prevalences Sample 1	Prevalences Sample 2	Prevalences Sample 3	Prevalences Sample 4	Prevalences Sample 5	Prevalences Sample 6	Prevalences Sample 7	Prevalences Sample 8	Prevalences Sample 9	Prevalences Sample 10	Prevalences Sample 11	Prevalences Sample 12	Prevalences Sample 13	Prevalences Sample 14	Prevalences Sample 15	Prevalences Sample 16
	1	C0000 C0001 C0010 C0100 C1000	1	-772979	[0.6486 0.6486] [0.007139 0.007139] [0.005103 0.005103] [0.004755 0.004755] [0.3344 0.3344]	[0.949 0.949] [0.01081 0.01081] [0.004225 0.004225] [0.003752 0.003752] [0.0322 0.0322]	[0.6239 0.6239] [0.2143 0.2143] [0.003775 0.003775] [0.003406 0.003406] [0.1546 0.1546]	[1 1] [1e-08 1e-08] [0 1e-08] [1e-08 1e-08] [1e-08 1e-08]	[0.7788 0.7788] [0.02817 0.02817] [1e-08 1e-08] [1e-08 1e-08] [0.1931 0.1931]	[0.5908 0.5908] [0.02573 0.02573] [1e-08 1e-08] [1e-08 1e-08] [0.3835 0.3835]	[1 1] [1e-08 1e-08] [0 1e-08] [1e-08 1e-08] [1e-08 1e-08]	[0.8182 0.8182] [0.005362 0.005362] [0.00361 0.00361] [0.003381 0.003381] [0.1695 0.1695]	[0.6779 0.6779] [0.01892 0.01892] [0.004946 0.004946] [0.209 0.209] [0.08923 0.08923]	[0.516 0.516] [0.01248 0.01248] [0.003911 0.003911] [0.003477 0.003477] [0.4641 0.4641]	[0.6707 0.6707] [0.1064 0.1064] [0.02982 0.02982] [0.1931 0.1931] [1e-08 1e-08]	[0.7266 0.7266] [0.01572 0.01572] [0.003499 0.003499] [0.002852 0.002852] [0.2514 0.2514]	[0.9013 0.9013] [0.01064 0.01064] [0.006128 0.006128] [0.001958 0.001958] [0.08 0.08]	[0.9728 0.9728] [0.005387 0.005387] [0.01025 0.01025] [0.001937 0.001937] [0.009597 0.009597]	[0.9664 0.9664] [0.01357 0.01357] [0.004105 0.004105] [0.002564 0.002564] [0.01331 0.01331]	[0.2124 0.2124] [0.01108 0.01108] [0.7629 0.7629] [1e-08 1e-08] [0.01368 0.01368]
	7)) SUPERNETSORKS' ESTIMATED PREVALENCES PER HAPLOTYPES
	************************************
	************************************
	Supernetwork	Clones' sets	C0000	C0001	C0010	C0100	C1000
	SN 1	Setclone 1	[0.6486 0.6486][0.949 0.949][0.6239 0.6239][1 1][0.7788 0.7788][0.5908 0.5908][1 1][0.8182 0.8182][0.6779 0.6779][0.516 0.516][0.6707 0.6707][0.7266 0.7266][0.9013 0.9013][0.9728 0.9728][0.9664 0.9664][0.2124 0.2124][0.007139 0.007139][0.01081 0.01081][0.2143 0.2143][1e-08 1e-08][0.02817 0.02817][0.02573 0.02573][1e-08 1e-08][0.005362 0.005362][0.01892 0.01892][0.01248 0.01248][0.1064 0.1064][0.0…

## Sheet: S4
	###################
	SUMMARY
	####################
		Number of Supernetworks :22
		Minimum number of breakpoints :3
		Number of distinct haplotypes : 10
	1)) MUTATIONS
	************************************
	************************************
	No	Mutants	Sample_1	Sample_2	Sample_3	Sample_4	Sample_5	Sample_6	Sample_7	Sample_8	Sample_9	Sample_10	Sample_11	Sample_12	Sample_13	Sample_14	Sample_15	Sample_16	Max Prevalence
	1	S4_431	0.0139767	0.0409237	0.00258138	0.542889	0.113336	0.00809784	0.00275354	0.00488587	0.0043205	0.00362902	0.00439957	0.00329007	0.00573559	0.703487	0.00356299	0.00494865	0.703487
	2	S4_674	0.189873	0.288563	0.144188	0.0544224	0.0745596	0.0689866	0.395628	0.117595	0.0808694	0.0988634	0.00938527	0.00415443	0.00484859	0.00393651	0.00480202	0.0033648	0.395628
	3	S4_709	0.273981	0.345341	0.558908	0.68472	0.617682	0.64865	0.143183	0.482284	0.618325	0.528267	0.815393	0.772674	0.707186	0.900741	0.924315	0.987166	0.987166
	4	S4_1013	0.0155313	0.0037669	0.0153177	0.0100507	0.029345	0.00939545	0.00348617	0.0643621	0.00327416	0.179779	0.0375673	0.0186149	0.00645238	0.00362965	0.00455543	0.0031101	0.179779
	5	S4_1387	0.0334917	0.310824	0.0738211	0.0437757	0.0992539	0.151684	0.0247818	0.110252	0.0493128	0.260304	0.0427596	0.040466	0.1505	0.0865924	0.0706959	0.0034654	0.310824
	6	S4_1401	0.107052	0.0782394	0.118526	0.512076	0.157483	0.0613892	0.0333209	0.0733575	0.489729	0.0783278	0.0667732	0.0634131	0.0385733	0.660686	0.0291042	0.028936	0.660686
	2)) Clusters
	************************************
	************************************
	No	Name	No mutations	No subnetworks
	1	S4_1401A	1	1
	2	S4_431G	1	1
	3	S4_674A	1	1
	4	S4_709T	1	1
	5	S4_1013T	1	1
	6	S4_1387T	1	1
	7	S4_431G_674A	2	1
	8	S4_431G_709T	2	3
	9	S4_674A_1401A	2	1
	10	S4_674A_1387T	2	1
	11	S4_674A_1013T	2	1
	12	S4_674A_709T	2	3
	13	S4_431G_1013T	2	1
	14	S4_709T_1387T	2	1
	15	S4_709T_1401A	2	3
	16	S4_709T_1013T	2	1
	17	S4_1013T_1401A	2	1
	18	S4_1013T_1387T	2	1
	19	S4_1387T_1401A	2	1
	20	S4_674A_1387T_1401A	3	1
	21	S4_431G_674A_709T	3	56
	22	S4_1013T_1387T_1401A	3	1
	23	S4_709T_1387T_1401A	3	10
	3)) DISTINCT HAPLOTYPES
	************************************
	************************************
	No	Short form	Long form	No occurences	Percent Occurencence
	1	C000000		22	100
	2	C000001	S4_1401	22	100
	3	C000010	S4_1387	22	100
	4	C000100	S4_1013	22	100
	5	C001000	S4_709	22	100
	6	C001001	S4_709-S4_1401	22	100
	7	C010000	S4_674	22	100
	8	C011000	S4_674-S4_709	22	100
	9	C100010	S4_431-S4_1387	22	100
	10	C101001	S4_431-S4_709-S4_1401	22	100
	4)) Haplotypes Tables
	************************************
	************************************
	>S4_1401A
		Clones	S4_1401	Sample 1	Sample 2	Sample 3	Sample 4	Sample 5	Sample 6	Sample 7	Sample 8	Sample 9	Sample 10	Sample 11	Sample 12	Sample 13	Sample 14	Sample 15	Sample 16	Type
		C0	0	15715	11958	15930	10061	7324	13837	18074	20691	9588	27911	22194	15257	7278	10647	40765	8524	Real
		C1	1	1884	1015	2142	10559	1369	905	623	1638	9202	2372	1588	1033	292	20731	1222	254	Real
	>S4_431G
		Clones	S4_431	Sample 1	Sample 2	Sample 3	Sample 4	Sample 5	Sample 6	Sample 7	Sample 8	Sample 9	Sample 10	Sample 11	Sample 12	Sample 13	Sample 14	Sample 15	Sample 16	Type
		C0	0	25115	14952	22797	15646	14168	23763	27887	27292	22815	34045	31455	21812	10401	12898	54814	10657	Real
		C1	1	356	638	59	18582	1811	194	77	134	99	124	139	72	60	30601	196	53	Real
	>S4_674A
		Clones	S4_674	Sample 1	Sample 2	Sample 3	Sample 4	Sample 5	Sample 6	Sample 7	Sample 8	Sample 9	Sample 10	Sample 11	Sample 12	Sample 13	Sample 14	Sample 15	Sample 16	Type
		C0	0	23582	13915	21961	29902	15391	24319	20432	27929	24061	34172	33776	23731	11699	39473	57407	10663	Real
		C1	1	5527	5644	3700	1721	1240	1802	13375	3722	2117	3749	320	99	57	156	277	36	Real
	>S4_709T
		Clones	S4_709	Sample 1	Sample 2	Sample 3	Sample 4	Sample 5	Sample 6	Sample 7	Sample 8	Sample 9	Sample 10	Sample 11	Sample 12	Sample 13	Sample 14	Sample 15	Sample 16	Type
		C0	0	21790	13048	11726	10624	6707	9640	28508	17695	10735	18683	6613	5622	3647	4019	4491	136	Real
		C1	1	8223	6883	14858	23073	10836	17797	4764	16484	17391	20922	29209	19109	8808	36471	54847	10461	Real
	>S4_1013T
		Clones	S4_1013	Sample 1	Sample 2	Sample 3	Sample 4	Sample 5	Sample 6	Sample 7	Sample 8	Sample 9	Sample 10	Sample 11	Sample 12	Sample 13	Sample 14	Sample 15	Sample 16	Type
		C0	0	19206	13488	19028	22260	10684	17713	22582	21951	19483	27420	26618	18294	8315	32392	47637	9616	Real
		C1	1	303	51	296	226	323	168	79	1510	64	6010	1039	347	54	118	218	30	Real
	>S4_1387T
		Clones	S4_1387	Sample 1	Sample 2	Sample 3	Sample 4	Sample 5	Sample 6	Sample 7	Sample 8	Sample 9	Sample 10	Sample 11	Sample 12	Sample 13	Sample 14	Sample 15	Sample 16	Type
		C0	0	16680	9379	16950	19288	7968	12768	18102	20014	17293	23188	22700	15650	6621	28470	39409	8627	Real
		C1	1	578	4230	1351	883	878	2283	460	2480	897	8160	1014	660	1173	2699	2998	30	Real
	>S4_431G_674A
		Clones	S4_431	S4_674	Sample 1	Sample 2	Sample 3	Sample 4	Sample 5	Sample 6	Sample 7	Sample 8	Sample 9	Sample 10	Sample 11	Sample 12	Sample 13	Sample 14	Sample 15	Sample 16	Type
		C00	0	0	4384	2520	5218	3406	3351	4900	4353	5282	4452	7314	7075	4778	2446	2783	11108	2000	Real
		C01	0	1	1164	1103	1030	400	376	410	3084	809	445	900	67	21	11	11	65	4	Real
		C10	1	0	53	123	7	4106	471	23	8	10	9	10	13	1	13	6406	14	4	Real
		C11	1	1	6	27	0	119	14	1	3	1	0	1	0	0	0	25	0	0	Artifact
	>S4_431G_709T
		Clones	S4_431	S4_709	Sample 1	Sample 2	Sample 3	Sample 4	Sample 5	Sample 6	Sample 7	Sample 8	Sample 9	Sample 10	Sample 11	Sample 12	Sample 13	Sample 14	Sample 15	Sample 16	Type
		C00	0	0	3394	1904	2219	1598	1239	1488	5310	2586	1542	3111	966	858	543	516	678	14	Real
		C01	0	1	1603	1214	3357	1979	2128	3224	1115	3093	3012	4228	5171	3496	1690	2096	9718	1742	Real
		C10	1	0	19	38	3	550	61	3	6	4	0	3	1	1	2	222	0	0	Real
		C11	1	1	41	85	0	3395	366	16	4	5	8	9	8	0	10	5761	18	4	Real
	>S4_674A_1401A
		Clones	S4_674	S4_1401	Sample 1	Sample 2	Sample 3	Sample 4	Sample 5	Sample 6	Sample 7	Sample 8	Sample 9	Sample 10	Sample 11	Sample 12	Sample 13	Sample 14	Sample 15	Sample 16	Type
		C00	0	0	166	114	183	181	108	141	288	322	140	161	252	188	90	172	580	68	Real
		C01	0	1	9	8	15	134	10	7	5	16	84	5	7	4	1	244	5	0	Real
		C10	1	0	23	54	17	7	5	10	150	16	10	12	0	0	0	1	0	0	Real
		C11	1	1	0	2	0	1	0	0	0	0	2	1	0	0	0	2	0	0	Artifact
	>S4_674A_1387T
		Clones	S4_674	S4_1387	Sample 1	Sample 2	Sample 3	Sample 4	Sample 5	Sample 6	Sample 7	Sample 8	Sample 9	Sample 10	Sample 11	Sample 12	Sample 13	Sample 14	Sample 15	Sample 16	Type
		C00	0	0	161	94	180	286	111	127	277	305	212	142	249	185	85	365	560	67	Real
		C01	0	1	3	51	13	13	12	29	6	29	3	42	11	5	14	40	24	0	Real
		C10	1	0	22	53	17	8	4	9	140	17	10	16	0	0	0	4	0	0	Real
		C11	1	1	0	7	0	0	0	0	3	0	0	0	0	0	0	0	0	0	Artifact
	>S4_674A_1013T
		Clones	S4_674	S4_1013	Sample 1	Sample 2	Sample 3	Sample 4	Sample 5	Sample 6	Sample 7	Sample 8	Sample 9	Sample 10	Sample 11	Sample 12	Sample 13	Sample 14	Sample 15	Sample 16	Type
		C00	0	0	692	482	871	1153	550	786	875	935	791	1084	1128	830	375	1538	2254	385	Real
		C01	0	1	4	2	10	8	14	6	2	60	5	206	37	10	0	2	5	2	Real
		C10	1	0	107	190	123	45	43	29	502	81	65	62	6	5	1	5	10	0	Real
		C11	1	1	0	1	0	0	0	0	0	2	0	1	1	0	0	0	0	0	Artifact
	>S4_674A_709T
		Clones	S4_674	S4_709	Sample 1	Sample 2	Sample 3	Sample 4	Sample 5	Sample 6	Sample 7	Sample 8	Sample 9	Sample 10	Sample 11	Sample 12	Sample 13	Sample 14	Sample 15	Sample 16	Type
		C00	0	0	11521	5479	5430	5592	3383	5015	11266	9050	5548	10207	3628	3232	2024	2324	2573	77	Real
		C01	0	1	6235	4962	10595	16409	7661	12764	3462	12103	12664	15443	20009	13721	6324	26161	38971	7554	Real
		C10	1	0	3396	3384	1993	926	681	984	8379	2132	1150	2006	105	19	18	3	9	1	Real
		C11	1	1	310	384	381	245	128	224	345	371	267	443	89	47	20	85	154	19	Real
	>S4_431G_1013T
		Clones	S4_431	S4_1013	Sample 1	Sample 2	Sample 3	Sample 4	Sample 5	Sample 6	Sample 7	Sample 8	Sample 9	Sample 10	Sample 11	Sample 12	Sample 13	Sample 14	Sample 15	Sample 16	Type
		C00	0	0	677	457	606	404	436	562	1119	879	669	588	860	632	311	298	1828	207	Real
		C01	0	1	3	1	9	5	9	1	5	40	3	93	27	9	2	1	9	0	Real
		C10	1	0	9	14	0	686	48	3	3	4	1	1	2	1	1	1011	0	1	Real
		C11	1	1	0	0	0	4	1	0	0	0	0	0	0	0	0	2	1	0	Artifact
	>S4_709T_1387T
		Clones	S4_709	S4_1387	Sample 1	Sample 2	Sample 3	Sample 4	Sample 5	Sample 6	Sample 7	Sample 8	Sample 9	Sample 10	Sample 11	Sample 12	Sample 13	Sample 14	Sample 15	Sample 16	Type
		C00	0	0	267	168	195	181	78	84	548	345	190	173	105	96	64	53	54	1	Real
		C01	0	1	9	89	19	11	15	44	17	55	7	64	13	8	19	42	30	0	Real
		C10	1	0	62	71	169	293	116	164	52	205	173	122	361	207	109	509	670	92	Real
		C11	1	1	0	10	2	6	1	11	1	6	0	13	7	5	3	25	9	0	Artifact
	>S4_709T_1401A
		Clones	S4_709	S4_1401	Sample 1	Sample 2	Sample 3	Sample 4	Sample 5	Sample 6	Sample 7	Sample 8	Sample 9	Sample 10	Sample 11	Sample 12	Sample 13	Sample 14	Sample 15	Sample 16	Type
		C00	0	0	270	231	192	138	89	119	589	386	153	204	112	97	70	53	57	1	Real
		C01	0	1	16	10	13	58	8	0	5	9	50	5	2	1	0	22	0	0	Real
		C10	1	0	54	70	153	154	97	170	53	194	88	121	375	215	108	196	710	92	Real
		C11	1	1	13	5	24	165	13	8	3	17	95	8	10	8	0	342	11	2	Real
	>S4_709T_1013T
		Clones	S4_709	S4_1013	Sample 1	Sample 2	Sample 3	Sample 4	Sample 5	Sample 6	Sample 7	Sample 8	Sample 9	Sample 10	Sample 11	Sample 12	Sample 13	Sample 14	Sample 15	Sample 16	Type
		C00	0	0	962	680	784	719	429	567	1631	899	595	925	402	380	240	235	298	5	Real
		C01	0	1	10	3	14	6	15	5	1	92	2	280	52	14	3	1	1	0	Real
		C10	1	0	216	229	720	1073	527	723	165	586	690	818	1427	828	373	1697	2567	467	Real
		C11	1	1	1	1	1	6	8	1	1	14	2	48	25	1	1	3	10	1	Artifact
	>S4_1013T_1401A
		Clones	S4_1013	S4_1401	Sample 1	Sample 2	Sample 3	Sample 4	Sample 5	Sample 6	Sample 7	Sample 8	Sample 9	Sample 10	Sample 11	Sample 12	Sample 13	Sample 14	Sample 15	Sample 16	Type
		C00	0	0	1029	819	1569	1001	734	1051	1689	1514	774	1792	1727	1333	572	1008	3340	553	Real
		C01	0	1	84	50	173	907	93	33	38	88	595	106	87	67	23	1675	55	12	Real
		C10	1	0	7	2	23	14	22	10	3	92	3	382	66	25	4	6	12	1	Real
		C11	1	1	0	0	0	5	3	0	0	1	0	11	1	0	0	3	0	0	Artifact
	>S4_1013T_1387T
		Clones	S4_1013	S4_1387	Sample 1	Sample 2	Sample 3	Sample 4	Sample 5	Sample 6	Sample 7	Sample 8	Sample 9	Sample 10	Sample 11	Sample 12	Sample 13	Sample 14	Sample 15	Sample 16	Type
		C00	0	0	1034	618	1582	1790	738	942	1602	1446	1257	1507	1671	1295	528	2369	3086	528	Real
		C01	0	1	33	278	106	72	74	154	19	138	50	492	62	41	66	223	191	1	Real
		C10	1	0	6	2	22	16	26	8	2	94	4	361	65	21	5	7	11	1	Real
		C11	1	1	1	0	1	0	1	1	0	1	0	40	1	0	0	1	2	0	Artifact
	>S4_1387T_1401A
		Clones	S4_1387	S4_1401	Sample 1	Sample 2	Sample 3	Sample 4	Sample 5	Sample 6	Sample 7	Sample 8	Sample 9	Sample 10	Sample 11	Sample 12	Sample 13	Sample 14	Sample 15	Sample 16	Type
		C00	0	0	13812	7267	13432	8497	5897	10599	15760	16802	8149	18367	19100	13164	5570	7671	33970	7605	Real
		C01	0	1	1370	698	1633	8879	1052	618	449	1214	7568	1741	1166	739	189	17711	866	177	Real
		C10	1	0	486	3627	1124	737	728	1941	371	2122	728	6998	870	545	992	2199	2508	23	Real
		C11	1	1	8	32	20	36	17	15	3	18	49	47	13	8	9	145	10	2	Artifact
	>S4_674A_1387T_1401A
		Clones	S4_674	S4_1387	S4_1401	Sample 1	Sample 2	Sample 3	Sample 4	Sample 5	Sample 6	Sample 7	Sample 8	Sample 9	Sample 10	Sample 11	Sample 12	Sample 13	Sample 14	Sample 15	Sample 16	Type
		C000	0	0	0	147	66	159	163	88	107	265	270	130	111	224	169	74	124	506	63	Real
		C001	0	0	1	9	7	13	116	8	7	4	15	73	5	5	2	1	210	5	0	Real
		C010	0	1	0	3	43	10	11	9	25	4	26	2	37	9	5	11	37	18	0	Real
		C011	0	1	1	0	0	0	0	0	0	0	0	1	0	0	0	0	0	0	0	Artifact
		C100	1	0	0	20	43	16	6	4	9	137	16	8	12	0	0	0	1	0	0	Real
		C101	1	0	1	0	2	0	1	0	0	0	0	2	1	0	0	0	2	0	0	Artifact
		C110	1	1	0	0	7	0	0	0	0	2	0	0	0	0	0	0	0	0	0	Artifact
	>S4_431G_674A_709T
		Clones	S4_431	S4_674	S4_709	Sample 1	Sample 2	Sample 3	Sample 4	Sample 5	Sample 6	Sample 7	Sample 8	Sample 9	Sample 10	Sample 11	Sample 12	Sample 13	Sample 14	Sample 15	Sample 16	Type
		C000	0	0	0	2068	969	1291	1067	788	1019	2359	1658	1036	2073	753	689	421	413	539	13	Real
		C001	0	0	1	1307	943	2638	1560	1671	2526	847	2484	2389	3396	4164	2816	1379	1697	7672	1422	Real
		C010	0	1	0	663	609	531	196	209	206	1884	418	216	451	22	6	4	1	0	0	Real
		C011	0	1	1	85	94	130	86	45	58	110	110	63	109	20	11	4	5	35	2	Real
		C100	1	0	0	13	22	3	382	44	2	4	2	0	3	1	1	2	188	0	0	Real
		C101	1	0	1	31	72	0	2662	295	14	4	5	8	5	7	0	9	4530	13	4	Real
		C110	1	1	0	4	12	0	65	9	1	1	1	0	0	0	0	0	0	0	0	Artifact
		C111	1	1	1	0	0	0	15	0	0	0	0	0	0	0	0	0	16	0	0	Artifact
	>S4_1013T_1387T_1401A
		Clones	S4_1013	S4_1387	S4_1401	Sample 1	Sample 2	Sample 3	Sample 4	Sample 5	Sample 6	Sample 7	Sample 8	Sample 9	Sample 10	Sample 11	Sample 12	Sample 13	Sample 14	Sample 15	Sample 16	Type
		C000	0	0	0	908	499	1340	874	599	824	1487	1271	671	1219	1495	1149	460	738	2798	497	Real
		C001	0	0	1	71	39	153	818	83	26	36	85	524	89	76	61	19	1463	48	10	Real
		C010	0	1	0	28	251	95	64	65	127	16	123	47	420	57	39	57	199	165	1	Real
		C011	0	1	1	0	0	1	3	0	1	0	0	0	3	0	0	0	3	0	0	Artifact
		C100	1	0	0	6	2	20	12	21	8	2	81	3	321	60	20	4	5	10	1	Real
		C101	1	0	1	0	0	0	4	3	0	0	1	0	11	1	0	0	2	0	0	Artifact
		C110	1	1	0	1	0	1	0	1	1	0	0	0	30	0	0	0	1	2	0	Artifact
	>S4_709T_1387T_1401A
		Clones	S4_709	S4_1387	S4_1401	Sample 1	Sample 2	Sample 3	Sample 4	Sample 5	Sample 6	Sample 7	Sample 8	Sample 9	Sample 10	Sample 11	Sample 12	Sample 13	Sample 14	Sample 15	Sample 16	Type
		C000	0	0	0	239	127	164	118	61	68	518	311	131	132	90	84	47	9	21	1	Real
		C001	0	0	1	14	8	11	51	7	0	5	7	46	4	1	0	0	20	0	0	Real
		C010	0	1	0	8	81	16	11	12	41	11	51	7	58	12	8	16	41	27	0	Real
		C100	1	0	0	49	58	138	142	92	149	50	177	85	100	337	187	102	163	621	84	Real
		C101	1	0	1	10	4	23	141	12	8	2	16	81	8	8	6	0	309	11	2	Real
		C110	1	1	0	0	8	2	5	1	7	1	5	0	11	7	2	0	24	7	0	Artifact
	5)) DISTINCT RETICULATIONS
	************************************
	************************************
	No	Ret_cloneA	ret_CloneB	Reticulation	Min Breakpoints	Supernetworks
	1	C000010	C101001	C100010	1	1	6	7	10	11	14	15	16	17	19	20
	2	C000000	C001001	C001000	1	1	3	17	18
	3	C001000	C010000	C011000	1	1	2	3	6	7	8	9	14
	4	C000001	C001000	C001001	1	2	4	5	14	15	16
	5	C001001	C100010	C101001	1	2	3	4	5	8	9	12	13	18	21	22
	6	C000000	C011000	C001000	1	4	16	19	20	21	22
	7	C000000	C011000	C010000	1	5	10	11	12	13	15	17	18
	8	C000000	C001001	C000001	1	6	8	10	12	19	21
	9	C000000	C101001	C000001	1	7	9	11	13	20	22
	6)) Clones sets
	************************************
	************************************
	No	Set of clones	No Supernetworks	Likelihood	Sample likelihood		Prevalences Sample 1	Prevalences Sample 2	Prevalences Sample 3	Prevalences Sample 4	Prevalences Sample 5	Prevalences Sample 6	Prevalences Sample 7	Prevalences Sample 8	Prevalences Sample 9	Prevalences Sample 10	Prevalences Sample 11	Prevalences Sample 12	Prevalences Sample 13	Prevalences Sample 14	Prevalences Sample 15	Prevalences Sample 16
	1	C000000 C000001 C000010 C000100 C001000 C001001 C010000 C011000 C100010 C101001	22	-2826473	[0.5835 0.5835] [1e-08 1e-08] [0.02124 0.02124] [0.01368 0.01368] [0.06984 0.06984] [0.1144 0.1144] [0.1055 0.1055] [0.07086 0.07086] [0.01147 0.01147] [0.009507 0.009507]	[0.3182 0.3182] [0.02136 0.02136] [0.3107 0.3107] [0.003662 0.003662] [1e-08 1e-08] [0.01575 0.01575] [0.0009746 0.0009746] [0.2885 0.2885] [5.527e-05 5.527e-05] [0.04082 0.04082]	[0.3492 0.3492] [0.01129 0.01129] [0.0713 0.0713] [0.01282 0.01282] [0.2938 0.2938] [0.1135 0.1135] [1e-08 1e-08] [0.1417 0.1417] [0.0065 0.0065] [1e-08 1e-08]	[0.2167 0.2167] [0.01706 0.01706] [1e-08 1e-08] [1e-08 1e-08] [0.1706 0.1706] [0.028 0.028] [0.03322 0.03322] [1e-08 1e-08] [0.04942 0.04942] [0.485 0.485]	[0.1743 0.1743] [0.0237 0.0237] [0.06906 0.06906] [1e-08 1e-08] [0.5168 0.5168] [0.01404 0.01404] [0.1039 0.1039] [1e-08 1e-08] [1e-08 1e-08] [0.09815 0.09815]	[0.1829 0.1829] [0.0001083 0.0001083] [0.1427 0.1427] [0.008503 0.008503] [0.5203 0.5203] [0.05591 0.05591] [0.03536 0.03536] [0.05092 0.05092] [0.003321 0.003321] [1e-08 1e-08]	[0.5266 0.5266] [0.002904 0.002904] [0.02007 0.02007] [0.004257 0.004257] [0.05006 0.05006] [0.03532 0.03532] [0.2599 0.2599] [0.1001 0.1001] [0.0007622 0.0007622] [1e-08 1e-08]	[0.3095 0.3095] [1e-08 1e-08] [0.09237 0.09237] [0.05241 0.05241] [0.3545 0.3545] [0.08252 0.08252] [0.08613 0.08613] [0.01931 0.01931] [0.002004 0.002004] [0.001229 0.001229]	[0.3078 0.3078] [1e-08 1e-08] [0.04049 0.04049] [0.01096 0.01096] [0.05136 0.05136] [0.4849 0.4849] [0.05669 0.05669] [0.04774 0.04774] [1e-08 1e-08] [1e-08 1e-08]	[0.03155 0.03155] [1.214e-06 1.214e-06] [0.2599 0.2599] [0.1797 0.1797] [0.351 0.351] [0.0746 0.0746] [0.00101 0.00101] [0.09876 0.09876] [4.682e-06 4.682e-06] [0.003526 0.003526]	[0.1039 0.1039] [0.000604 0.000604] [0.04148 0.04148] [0.03686 0.03686] [0.7421 0.7421] [0.06275 0.06275] [0.004923 0.004923] [0.004784 0.004784] [1e-08 1e-08] [0.002635 0.002635]	[0.168 0.168] [0.0004671 0.0004671] [0.04023 0.04023] [0.01849 0.01849] [0.7055 0.7055] [0.06013 0.06013] [0.001625 0.001625] [0.00361 0.00361] [1e-08 1e-08] [0.001938 0.001938]	[0.1355 0.1355] [1e-08 1e-08] [0.1504 0.1504] [0.006361 0.006361] [0.6637 0.6637] [0.03275 0.03275] [0.0008071 0.0008071] [0.004742 0.004742] [0.0001425 0.0001425] [0.005639 0.005639]	[0.008947 0.008947] [0.001056 0.001056] [0.04368 0.04368] [0.003521 0.003521] [0.2357 0.2357] [1e-08 1e-08] [1.37e-05 1.37e-05] [0.003796 0.003796] [0.04267 0.04267] [0.6606 0.6606]	[0.0004631 0.0004631] [8.417e-05 8.417e-05] [0.07068 0.07068] [0.004564 0.004564] [0.8901 0.8901] [0.02553 0.02553] [0.0002565 0.0002565] [0.00479 0.00479] [1e-05 1e-05] [0.003495 0.003495]	[0.006277 0.006277] [7.475e-05 7.475e-05] [0.003439 0.003439] [0.003109 0.003109] [0.9546 0.9546] [0.02402 0.02402] [0.0001431 0.0001431] [0.003356 0.003356] [1e-05 1e-05] [0.004927 0.004927]
	7)) SUPERNETSORKS' ESTIMATED PREVALENCES PER HAPLOTYPES
	************************************
	************************************
	Supernetwork	Clones' sets	C000000	C000001	C000010	C000100	C001000	C001001	C010000	C011000	C100010	C101001
	SN 1	Setclone 1	[0.5835 0.5835][0.3182 0.3182][0.3492 0.3492][0.2167 0.2167][0.1743 0.1743][0.1829 0.1829][0.5266 0.5266][0.3095 0.3095][0.3078 0.3078][0.03155 0.03155][0.1039 0.1039][0.168 0.168][0.1355 0.1355][0.008947 0.008947][0.0004631 0.0004631][0.006277 0.006277][1e-08 1e-08][0.02136 0.02136][0.01129 0.01129][0.01706 0.01706][0.0237 0.0237][0.0001083 0.0001083][0.002904 0.002904][1e-08 1e-08][1e-08 1e-08]…
	SN 2	Setclone 1	[0.5835 0.5835][0.3182 0.3182][0.3492 0.3492][0.2167 0.2167][0.1743 0.1743][0.1829 0.1829][0.5266 0.5266][0.3095 0.3095][0.3078 0.3078][0.03155 0.03155][0.1039 0.1039][0.168 0.168][0.1355 0.1355][0.008947 0.008947][0.0004631 0.0004631][0.006277 0.006277][1e-08 1e-08][0.02136 0.02136][0.01129 0.01129][0.01706 0.01706][0.0237 0.0237][0.0001083 0.0001083][0.002904 0.002904][1e-08 1e-08][1e-08 1e-08]…
	SN 3	Setclone 1	[0.5835 0.5835][0.3182 0.3182][0.3492 0.3492][0.2167 0.2167][0.1743 0.1743][0.1829 0.1829][0.5266 0.5266][0.3095 0.3095][0.3078 0.3078][0.03155 0.03155][0.1039 0.1039][0.168 0.168][0.1355 0.1355][0.008947 0.008947][0.0004631 0.0004631][0.006277 0.006277][1e-08 1e-08][0.02136 0.02136][0.01129 0.01129][0.01706 0.01706][0.0237 0.0237][0.0001083 0.0001083][0.002904 0.002904][1e-08 1e-08][1e-08 1e-08]…
	SN 4	Setclone 1	[0.5835 0.5835][0.3182 0.3182][0.3492 0.3492][0.2167 0.2167][0.1743 0.1743][0.1829 0.1829][0.5266 0.5266][0.3095 0.3095][0.3078 0.3078][0.03155 0.03155][0.1039 0.1039][0.168 0.168][0.1355 0.1355][0.008947 0.008947][0.0004631 0.0004631][0.006277 0.006277][1e-08 1e-08][0.02136 0.02136][0.01129 0.01129][0.01706 0.01706][0.0237 0.0237][0.0001083 0.0001083][0.002904 0.002904][1e-08 1e-08][1e-08 1e-08]…
	SN 5	Setclone 1	[0.5835 0.5835][0.3182 0.3182][0.3492 0.3492][0.2167 0.2167][0.1743 0.1743][0.1829 0.1829][0.5266 0.5266][0.3095 0.3095][0.3078 0.3078][0.03155 0.03155][0.1039 0.1039][0.168 0.168][0.1355 0.1355][0.008947 0.008947][0.0004631 0.0004631][0.006277 0.006277][1e-08 1e-08][0.02136 0.02136][0.01129 0.01129][0.01706 0.01706][0.0237 0.0237][0.0001083 0.0001083][0.002904 0.002904][1e-08 1e-08][1e-08 1e-08]…
	SN 6	Setclone 1	[0.5835 0.5835][0.3182 0.3182][0.3492 0.3492][0.2167 0.2167][0.1743 0.1743][0.1829 0.1829][0.5266 0.5266][0.3095 0.3095][0.3078 0.3078][0.03155 0.03155][0.1039 0.1039][0.168 0.168][0.1355 0.1355][0.008947 0.008947][0.0004631 0.0004631][0.006277 0.006277][1e-08 1e-08][0.02136 0.02136][0.01129 0.01129][0.01706 0.01706][0.0237 0.0237][0.0001083 0.0001083][0.002904 0.002904][1e-08 1e-08][1e-08 1e-08]…
	SN 7	Setclone 1	[0.5835 0.5835][0.3182 0.3182][0.3492 0.3492][0.2167 0.2167][0.1743 0.1743][0.1829 0.1829][0.5266 0.5266][0.3095 0.3095][0.3078 0.3078][0.03155 0.03155][0.1039 0.1039][0.168 0.168][0.1355 0.1355][0.008947 0.008947][0.0004631 0.0004631][0.006277 0.006277][1e-08 1e-08][0.02136 0.02136][0.01129 0.01129][0.01706 0.01706][0.0237 0.0237][0.0001083 0.0001083][0.002904 0.002904][1e-08 1e-08][1e-08 1e-08]…
	SN 8	Setclone 1	[0.5835 0.5835][0.3182 0.3182][0.3492 0.3492][0.2167 0.2167][0.1743 0.1743][0.1829 0.1829][0.5266 0.5266][0.3095 0.3095][0.3078 0.3078][0.03155 0.03155][0.1039 0.1039][0.168 0.168][0.1355 0.1355][0.008947 0.008947][0.0004631 0.0004631][0.006277 0.006277][1e-08 1e-08][0.02136 0.02136][0.01129 0.01129][0.01706 0.01706][0.0237 0.0237][0.0001083 0.0001083][0.002904 0.002904][1e-08 1e-08][1e-08 1e-08]…
	SN 9	Setclone 1	[0.5835 0.5835][0.3182 0.3182][0.3492 0.3492][0.2167 0.2167][0.1743 0.1743][0.1829 0.1829][0.5266 0.5266][0.3095 0.3095][0.3078 0.3078][0.03155 0.03155][0.1039 0.1039][0.168 0.168][0.1355 0.1355][0.008947 0.008947][0.0004631 0.0004631][0.006277 0.006277][1e-08 1e-08][0.02136 0.02136][0.01129 0.01129][0.01706 0.01706][0.0237 0.0237][0.0001083 0.0001083][0.002904 0.002904][1e-08 1e-08][1e-08 1e-08]…
	SN 10	Setclone 1	[0.5835 0.5835][0.3182 0.3182][0.3492 0.3492][0.2167 0.2167][0.1743 0.1743][0.1829 0.1829][0.5266 0.5266][0.3095 0.3095][0.3078 0.3078][0.03155 0.03155][0.1039 0.1039][0.168 0.168][0.1355 0.1355][0.008947 0.008947][0.0004631 0.0004631][0.006277 0.006277][1e-08 1e-08][0.02136 0.02136][0.01129 0.01129][0.01706 0.01706][0.0237 0.0237][0.0001083 0.0001083][0.002904 0.002904][1e-08 1e-08][1e-08 1e-08]…
	SN 11	Setclone 1	[0.5835 0.5835][0.3182 0.3182][0.3492 0.3492][0.2167 0.2167][0.1743 0.1743][0.1829 0.1829][0.5266 0.5266][0.3095 0.3095][0.3078 0.3078][0.03155 0.03155][0.1039 0.1039][0.168 0.168][0.1355 0.1355][0.008947 0.008947][0.0004631 0.0004631][0.006277 0.006277][1e-08 1e-08][0.02136 0.02136][0.01129 0.01129][0.01706 0.01706][0.0237 0.0237][0.0001083 0.0001083][0.002904 0.002904][1e-08 1e-08][1e-08 1e-08]…
	SN 12	Setclone 1	[0.5835 0.5835][0.3182 0.3182][0.3492 0.3492][0.2167 0.2167][0.1743 0.1743][0.1829 0.1829][0.5266 0.5266][0.3095 0.3095][0.3078 0.3078][0.03155 0.03155][0.1039 0.1039][0.168 0.168][0.1355 0.1355][0.008947 0.008947][0.0004631 0.0004631][0.006277 0.006277][1e-08 1e-08][0.02136 0.02136][0.01129 0.01129][0.01706 0.01706][0.0237 0.0237][0.0001083 0.0001083][0.002904 0.002904][1e-08 1e-08][1e-08 1e-08]…
	SN 13	Setclone 1	[0.5835 0.5835][0.3182 0.3182][0.3492 0.3492][0.2167 0.2167][0.1743 0.1743][0.1829 0.1829][0.5266 0.5266][0.3095 0.3095][0.3078 0.3078][0.03155 0.03155][0.1039 0.1039][0.168 0.168][0.1355 0.1355][0.008947 0.008947][0.0004631 0.0004631][0.006277 0.006277][1e-08 1e-08][0.02136 0.02136][0.01129 0.01129][0.01706 0.01706][0.0237 0.0237][0.0001083 0.0001083][0.002904 0.002904][1e-08 1e-08][1e-08 1e-08]…
	SN 14	Setclone 1	[0.5835 0.5835][0.3182 0.3182][0.3492 0.3492][0.2167 0.2167][0.1743 0.1743][0.1829 0.1829][0.5266 0.5266][0.3095 0.3095][0.3078 0.3078][0.03155 0.03155][0.1039 0.1039][0.168 0.168][0.1355 0.1355][0.008947 0.008947][0.0004631 0.0004631][0.006277 0.006277][1e-08 1e-08][0.02136 0.02136][0.01129 0.01129][0.01706 0.01706][0.0237 0.0237][0.0001083 0.0001083][0.002904 0.002904][1e-08 1e-08][1e-08 1e-08]…
	SN 15	Setclone 1	[0.5835 0.5835][0.3182 0.3182][0.3492 0.3492][0.2167 0.2167][0.1743 0.1743][0.1829 0.1829][0.5266 0.5266][0.3095 0.3095][0.3078 0.3078][0.03155 0.03155][0.1039 0.1039][0.168 0.168][0.1355 0.1355][0.008947 0.008947][0.0004631 0.0004631][0.006277 0.006277][1e-08 1e-08][0.02136 0.02136][0.01129 0.01129][0.01706 0.01706][0.0237 0.0237][0.0001083 0.0001083][0.002904 0.002904][1e-08 1e-08][1e-08 1e-08]…
	SN 16	Setclone 1	[0.5835 0.5835][0.3182 0.3182][0.3492 0.3492][0.2167 0.2167][0.1743 0.1743][0.1829 0.1829][0.5266 0.5266][0.3095 0.3095][0.3078 0.3078][0.03155 0.03155][0.1039 0.1039][0.168 0.168][0.1355 0.1355][0.008947 0.008947][0.0004631 0.0004631][0.006277 0.006277][1e-08 1e-08][0.02136 0.02136][0.01129 0.01129][0.01706 0.01706][0.0237 0.0237][0.0001083 0.0001083][0.002904 0.002904][1e-08 1e-08][1e-08 1e-08]…
	SN 17	Setclone 1	[0.5835 0.5835][0.3182 0.3182][0.3492 0.3492][0.2167 0.2167][0.1743 0.1743][0.1829 0.1829][0.5266 0.5266][0.3095 0.3095][0.3078 0.3078][0.03155 0.03155][0.1039 0.1039][0.168 0.168][0.1355 0.1355][0.008947 0.008947][0.0004631 0.0004631][0.006277 0.006277][1e-08 1e-08][0.02136 0.02136][0.01129 0.01129][0.01706 0.01706][0.0237 0.0237][0.0001083 0.0001083][0.002904 0.002904][1e-08 1e-08][1e-08 1e-08]…
	SN 18	Setclone 1	[0.5835 0.5835][0.3182 0.3182][0.3492 0.3492][0.2167 0.2167][0.1743 0.1743][0.1829 0.1829][0.5266 0.5266][0.3095 0.3095][0.3078 0.3078][0.03155 0.03155][0.1039 0.1039][0.168 0.168][0.1355 0.1355][0.008947 0.008947][0.0004631 0.0004631][0.006277 0.006277][1e-08 1e-08][0.02136 0.02136][0.01129 0.01129][0.01706 0.01706][0.0237 0.0237][0.0001083 0.0001083][0.002904 0.002904][1e-08 1e-08][1e-08 1e-08]…
	SN 19	Setclone 1	[0.5835 0.5835][0.3182 0.3182][0.3492 0.3492][0.2167 0.2167][0.1743 0.1743][0.1829 0.1829][0.5266 0.5266][0.3095 0.3095][0.3078 0.3078][0.03155 0.03155][0.1039 0.1039][0.168 0.168][0.1355 0.1355][0.008947 0.008947][0.0004631 0.0004631][0.006277 0.006277][1e-08 1e-08][0.02136 0.02136][0.01129 0.01129][0.01706 0.01706][0.0237 0.0237][0.0001083 0.0001083][0.002904 0.002904][1e-08 1e-08][1e-08 1e-08]…
	SN 20	Setclone 1	[0.5835 0.5835][0.3182 0.3182][0.3492 0.3492][0.2167 0.2167][0.1743 0.1743][0.1829 0.1829][0.5266 0.5266][0.3095 0.3095][0.3078 0.3078][0.03155 0.03155][0.1039 0.1039][0.168 0.168][0.1355 0.1355][0.008947 0.008947][0.0004631 0.0004631][0.006277 0.006277][1e-08 1e-08][0.02136 0.02136][0.01129 0.01129][0.01706 0.01706][0.0237 0.0237][0.0001083 0.0001083][0.002904 0.002904][1e-08 1e-08][1e-08 1e-08]…
	SN 21	Setclone 1	[0.5835 0.5835][0.3182 0.3182][0.3492 0.3492][0.2167 0.2167][0.1743 0.1743][0.1829 0.1829][0.5266 0.5266][0.3095 0.3095][0.3078 0.3078][0.03155 0.03155][0.1039 0.1039][0.168 0.168][0.1355 0.1355][0.008947 0.008947][0.0004631 0.0004631][0.006277 0.006277][1e-08 1e-08][0.02136 0.02136][0.01129 0.01129][0.01706 0.01706][0.0237 0.0237][0.0001083 0.0001083][0.002904 0.002904][1e-08 1e-08][1e-08 1e-08]…
	SN 22	Setclone 1	[0.5835 0.5835][0.3182 0.3182][0.3492 0.3492][0.2167 0.2167][0.1743 0.1743][0.1829 0.1829][0.5266 0.5266][0.3095 0.3095][0.3078 0.3078][0.03155 0.03155][0.1039 0.1039][0.168 0.168][0.1355 0.1355][0.008947 0.008947][0.0004631 0.0004631][0.006277 0.006277][1e-08 1e-08][0.02136 0.02136][0.01129 0.01129][0.01706 0.01706][0.0237 0.0237][0.0001083 0.0001083][0.002904 0.002904][1e-08 1e-08][1e-08 1e-08]…

## Sheet: S5
	###################
	SUMMARY
	####################
		Number of Supernetworks :1
		Minimum number of breakpoints :0
		Number of distinct haplotypes : 3
	1)) MUTATIONS
	************************************
	************************************
	No	Mutants	Sample_1	Sample_2	Sample_3	Sample_4	Sample_5	Sample_6	Sample_7	Sample_8	Sample_9	Sample_10	Sample_11	Sample_12	Sample_13	Sample_14	Sample_15	Sample_16	Max Prevalence
	1	S5_534	0.0060795	0.00496458	0.00370489	0.00512226	0.00357614	0.00460802	0.00372081	0.00397034	0.00403153	0.196004	0.00411617	0.00426764	0.00342442	0.00356637	0.00378788	0.00359692	0.196004
	2	S5_1191	0.00833506	0.00722022	0.00724866	0.00785068	0.00510768	0.00805985	0.00649022	0.00666549	0.00745799	0.146345	0.00799932	0.0351614	0.00675764	0.00799027	0.00831607	0.00797574	0.146345
	2)) Clusters
	************************************
	************************************
	No	Name	No mutations	No subnetworks
	1	S5_534C	1	1
	2	S5_1191T	1	1
	3	S5_534C_1191T	2	1
	3)) DISTINCT HAPLOTYPES
	************************************
	************************************
	No	Short form	Long form	No occurences	Percent Occurencence
	1	C00		1	100
	2	C01	S5_1191	1	100
	3	C10	S5_534	1	100
	4)) Haplotypes Tables
	************************************
	************************************
	>S5_534C
		Clones	S5_534	Sample 1	Sample 2	Sample 3	Sample 4	Sample 5	Sample 6	Sample 7	Sample 8	Sample 9	Sample 10	Sample 11	Sample 12	Sample 13	Sample 14	Sample 15	Sample 16	Type
		C0	0	25831	35676	46522	36903	23405	33482	39896	30355	33104	50294	47905	33365	14551	52806	75218	18006	Real
		C1	1	158	178	173	190	84	155	149	121	134	12261	198	143	50	189	286	65	Real
	>S5_1191T
		Clones	S5_1191	Sample 1	Sample 2	Sample 3	Sample 4	Sample 5	Sample 6	Sample 7	Sample 8	Sample 9	Sample 10	Sample 11	Sample 12	Sample 13	Sample 14	Sample 15	Sample 16	Type
		C0	0	23914	33000	40950	32479	18894	27445	37351	28166	31541	46928	46628	31227	15139	48916	71311	17662	Real
		C1	1	201	240	299	257	97	223	244	189	237	8045	376	1138	103	394	598	142	Real
	>S5_534C_1191T
		Clones	S5_534	S5_1191	Sample 1	Sample 2	Sample 3	Sample 4	Sample 5	Sample 6	Sample 7	Sample 8	Sample 9	Sample 10	Sample 11	Sample 12	Sample 13	Sample 14	Sample 15	Sample 16	Type
		C00	0	0	812	1507	1680	1597	857	951	1963	1161	1155	1096	1722	1220	607	1994	2836	458	Real
		C01	0	1	2	4	2	5	1	3	9	9	3	137	3	29	8	6	18	2	Real
		C10	1	0	1	2	0	6	2	1	2	0	0	198	2	2	1	0	3	0	Real
		C11	1	1	0	0	0	0	0	0	0	0	0	6	0	0	1	0	0	0	Artifact
	5)) DISTINCT RETICULATIONS
	************************************
	************************************
	No	Ret_cloneA	ret_CloneB	Reticulation	Min Breakpoints	Supernetworks
	6)) Clones sets
	************************************
	************************************
	No	Set of clones	No Supernetworks	Likelihood	Sample likelihood		Prevalences Sample 1	Prevalences Sample 2	Prevalences Sample 3	Prevalences Sample 4	Prevalences Sample 5	Prevalences Sample 6	Prevalences Sample 7	Prevalences Sample 8	Prevalences Sample 9	Prevalences Sample 10	Prevalences Sample 11	Prevalences Sample 12	Prevalences Sample 13	Prevalences Sample 14	Prevalences Sample 15	Prevalences Sample 16
	1	C00 C01 C10	1	-201172	[0.9859 0.9859] [0.008209 0.008209] [0.005897 0.005897]	[0.9881 0.9881] [0.007105 0.007105] [0.004786 0.004786]	[0.9893 0.9893] [0.007163 0.007163] [0.003557 0.003557]	[0.987 0.987] [0.007851 0.007851] [0.005122 0.005122]	[0.9914 0.9914] [0.005006 0.005006] [0.003582 0.003582]	[0.9875 0.9875] [0.008002 0.008002] [0.004488 0.004488]	[0.9898 0.9898] [0.00649 0.00649] [0.003721 0.003721]	[0.9894 0.9894] [0.006665 0.006665] [0.00397 0.00397]	[0.9887 0.9887] [0.007421 0.007421] [0.00387 0.00387]	[0.6608 0.6608] [0.1448 0.1448] [0.1944 0.1944]	[0.9881 0.9881] [0.007904 0.007904] [0.004042 0.004042]	[0.9607 0.9607] [0.03516 0.03516] [0.004191 0.004191]	[0.9898 0.9898] [0.006923 0.006923] [0.003287 0.003287]	[0.9927 0.9927] [0.007326 0.007326] [1e-08 1e-08]	[0.9879 0.9879] [0.008316 0.008316] [0.003788 0.003788]	[0.9964 0.9964] [1e-08 1e-08] [0.003597 0.003597]
	7)) SUPERNETSORKS' ESTIMATED PREVALENCES PER HAPLOTYPES
	************************************
	************************************
	Supernetwork	Clones' sets	C00	C01	C10
	SN 1	Setclone 1	[0.9859 0.9859][0.9881 0.9881][0.9893 0.9893][0.987 0.987][0.9914 0.9914][0.9875 0.9875][0.9898 0.9898][0.9894 0.9894][0.9887 0.9887][0.6608 0.6608][0.9881 0.9881][0.9607 0.9607][0.9898 0.9898][0.9927 0.9927][0.9879 0.9879][0.9964 0.9964][0.008209 0.008209][0.007105 0.007105][0.007163 0.007163][0.007851 0.007851][0.005006 0.005006][0.008002 0.008002][0.00649 0.00649][0.006665 0.006665][0.007421 0…

## Sheet: S6
	###################
	SUMMARY
	####################
		Number of Supernetworks :1
		Minimum number of breakpoints :0
		Number of distinct haplotypes : 6
	1)) MUTATIONS
	************************************
	************************************
	No	Mutants	Sample_1	Sample_2	Sample_3	Sample_4	Sample_5	Sample_6	Sample_7	Sample_8	Sample_9	Sample_10	Sample_11	Sample_12	Sample_13	Sample_14	Sample_15	Sample_16	Max Prevalence
	1	S6_45	0.0213636	0.025931	0.0174242	0.0217796	0.0169492	0.0253684	0.0140193	0.0204838	0.0224762	0.239364	0.0415781	0.0951728	0.0230695	0.0177339	0.0185428	0.0209182	0.239364
	2	S6_146	0.0230379	0.00903658	0.00988683	0.2377	0.205278	0.011659	0.00973792	0.00901733	0.0177816	0.00973126	0.00973701	0.00938434	0.00960874	0.00997618	0.0113371	0.0104066	0.2377
	3	S6_537	0.0034022	0.00259391	0.00165969	0.00179968	0.00204486	0.00165542	0.00159889	0.00170935	0.00193986	0.00208826	0.244902	0.00178442	0.00319618	0.00155196	0.00139837	0.00170169	0.244902
	4	S6_1024	0.0031183	0.00306404	0.00334298	0.00258934	0.0025777	0.00257185	0.00227466	0.00286339	0.00328548	0.00332635	0.00408632	0.00333276	0.0557005	0.00961483	0.00350887	0.73874	0.73874
	5	S6_1106	0.00693642	0.0187095	0.00467318	0.536006	0.157656	0.0108671	0.00410134	0.00449043	0.00548309	0.005197	0.00430288	0.00428504	0.00398731	0.004644	0.00464388	0.00388505	0.536006
	2)) Clusters
	************************************
	************************************
	No	Name	No mutations	No subnetworks
	1	S6_45G	1	1
	2	S6_146T	1	1
	3	S6_537A	1	1
	4	S6_1024A	1	1
	5	S6_1106C	1	1
	6	S6_45G_537A	2	1
	7	S6_45G_146T	2	1
	8	S6_146T_1024A	2	1
	9	S6_146T_537A	2	1
	10	S6_537A_1106C	2	1
	11	S6_537A_1024A	2	1
	12	S6_1024A_1106C	2	1
	3)) DISTINCT HAPLOTYPES
	************************************
	************************************
	No	Short form	Long form	No occurences	Percent Occurencence
	1	C00000		1	100
	2	C00001	S6_1106	1	100
	3	C00010	S6_1024	1	100
	4	C00100	S6_537	1	100
	5	C01000	S6_146	1	100
	6	C10000	S6_45	1	100
	4)) Haplotypes Tables
	************************************
	************************************
	>S6_45G
		Clones	S6_45	Sample 1	Sample 2	Sample 3	Sample 4	Sample 5	Sample 6	Sample 7	Sample 8	Sample 9	Sample 10	Sample 11	Sample 12	Sample 13	Sample 14	Sample 15	Sample 16	Type
		C0	0	4306	6461	7782	8938	4698	7607	7455	5021	7698	7563	8114	7254	3049	10247	14238	3604	Real
		C1	1	94	172	138	199	81	198	106	105	177	2380	352	763	72	185	269	77	Real
	>S6_146T
		Clones	S6_146	Sample 1	Sample 2	Sample 3	Sample 4	Sample 5	Sample 6	Sample 7	Sample 8	Sample 9	Sample 10	Sample 11	Sample 12	Sample 13	Sample 14	Sample 15	Sample 16	Type
		C0	0	23875	33995	39457	45568	24270	38062	38541	26815	38556	37143	41494	35785	15770	50711	69852	17402	Real
		C1	1	563	310	394	14209	6269	449	379	244	698	365	408	339	153	511	801	183	Real
	>S6_537A
		Clones	S6_537	Sample 1	Sample 2	Sample 3	Sample 4	Sample 5	Sample 6	Sample 7	Sample 8	Sample 9	Sample 10	Sample 11	Sample 12	Sample 13	Sample 14	Sample 15	Sample 16	Type
		C0	0	28414	43066	57746	61012	31234	48246	51828	34457	49392	57344	54549	48109	19648	70768	96406	23466	Real
		C1	1	97	112	96	110	64	80	83	59	96	120	17692	86	63	110	135	40	Real
	>S6_1024A
		Clones	S6_1024	Sample 1	Sample 2	Sample 3	Sample 4	Sample 5	Sample 6	Sample 7	Sample 8	Sample 9	Sample 10	Sample 11	Sample 12	Sample 13	Sample 14	Sample 15	Sample 16	Type
		C0	0	20460	32862	39950	44683	20121	31026	36406	25073	36101	43746	43382	34989	14478	51812	70430	5783	Real
		C1	1	64	101	134	116	52	80	83	72	119	146	178	117	854	503	248	16352	Real
	>S6_1106C
		Clones	S6_1106	Sample 1	Sample 2	Sample 3	Sample 4	Sample 5	Sample 6	Sample 7	Sample 8	Sample 9	Sample 10	Sample 11	Sample 12	Sample 13	Sample 14	Sample 15	Sample 16	Type
		C0	0	16321	26644	33439	20464	15051	25941	30110	20396	29202	36561	36793	29511	12240	43295	59157	16153	Real
		C1	1	114	508	157	23640	2817	285	124	92	161	191	159	127	49	202	276	63	Real
	>S6_45G_537A
		Clones	S6_45	S6_537	Sample 1	Sample 2	Sample 3	Sample 4	Sample 5	Sample 6	Sample 7	Sample 8	Sample 9	Sample 10	Sample 11	Sample 12	Sample 13	Sample 14	Sample 15	Sample 16	Type
		C00	0	0	232	447	598	708	361	479	642	318	474	387	475	436	192	748	953	157	Real
		C01	0	1	0	0	0	0	0	0	0	1	1	1	161	2	1	1	1	1	Real
		C10	1	0	2	0	8	7	0	3	3	0	1	140	7	44	3	3	4	2	Real
		C11	1	1	2	1	1	1	1	2	0	0	5	1	8	1	2	3	2	2	Artifact
	>S6_45G_146T
		Clones	S6_45	S6_146	Sample 1	Sample 2	Sample 3	Sample 4	Sample 5	Sample 6	Sample 7	Sample 8	Sample 9	Sample 10	Sample 11	Sample 12	Sample 13	Sample 14	Sample 15	Sample 16	Type
		C00	0	0	1413	1689	1711	1761	902	2222	1389	1514	2387	2529	2305	1934	808	2556	3957	1224	Real
		C01	0	1	32	34	29	197	69	33	22	18	31	31	34	23	15	35	64	19	Real
		C10	1	0	18	19	8	17	5	19	10	13	27	729	68	167	12	14	24	5	Real
		C11	1	1	1	2	2	1	0	1	0	0	0	3	0	0	0	0	0	0	Artifact
	>S6_146T_1024A
		Clones	S6_146	S6_1024	Sample 1	Sample 2	Sample 3	Sample 4	Sample 5	Sample 6	Sample 7	Sample 8	Sample 9	Sample 10	Sample 11	Sample 12	Sample 13	Sample 14	Sample 15	Sample 16	Type
		C00	0	0	150	318	182	474	143	167	458	222	254	95	216	275	108	373	529	21	Real
		C01	0	1	0	0	1	1	0	0	0	1	0	0	0	0	10	4	1	60	Real
		C10	1	0	1	3	2	171	53	0	2	2	0	0	0	2	1	1	0	0	Real
	>S6_146T_537A
		Clones	S6_146	S6_537	Sample 1	Sample 2	Sample 3	Sample 4	Sample 5	Sample 6	Sample 7	Sample 8	Sample 9	Sample 10	Sample 11	Sample 12	Sample 13	Sample 14	Sample 15	Sample 16	Type
		C00	0	0	1964	3265	4341	5025	2763	3530	4522	2521	3353	3072	3750	3315	1536	5161	6714	1395	Real
		C01	0	1	4	1	2	3	1	1	1	1	1	1	1453	2	6	2	1	1	Real
		C10	1	0	39	26	56	1786	805	34	66	35	87	45	52	48	21	73	89	26	Real
		C11	1	1	0	0	0	1	0	0	0	0	0	0	16	0	0	0	0	0	Artifact
	>S6_537A_1106C
		Clones	S6_537	S6_1106	Sample 1	Sample 2	Sample 3	Sample 4	Sample 5	Sample 6	Sample 7	Sample 8	Sample 9	Sample 10	Sample 11	Sample 12	Sample 13	Sample 14	Sample 15	Sample 16	Type
		C00	0	0	691	1392	1565	1164	936	1210	1997	1031	1321	933	1444	1314	626	2043	2644	435	Real
		C01	0	1	4	34	7	1594	165	12	11	2	8	4	3	3	2	10	14	1	Real
		C10	1	0	0	1	0	0	0	1	0	0	0	0	438	0	0	0	0	1	Real
		C11	1	1	0	0	0	1	0	0	0	0	0	0	2	0	0	0	0	0	Artifact
	>S6_537A_1024A
		Clones	S6_537	S6_1024	Sample 1	Sample 2	Sample 3	Sample 4	Sample 5	Sample 6	Sample 7	Sample 8	Sample 9	Sample 10	Sample 11	Sample 12	Sample 13	Sample 14	Sample 15	Sample 16	Type
		C00	0	0	990	1851	2215	3134	1328	1669	2530	1394	1868	1523	1918	1886	812	2791	3636	189	Real
		C01	0	1	4	7	7	8	2	6	7	4	5	8	9	3	65	30	19	673	Real
		C10	1	0	1	0	1	2	0	1	1	0	1	1	629	0	0	0	0	0	Real
		C11	1	1	0	0	0	0	0	0	0	0	0	0	2	0	0	0	0	0	Artifact
	>S6_1024A_1106C
		Clones	S6_1024	S6_1106	Sample 1	Sample 2	Sample 3	Sample 4	Sample 5	Sample 6	Sample 7	Sample 8	Sample 9	Sample 10	Sample 11	Sample 12	Sample 13	Sample 14	Sample 15	Sample 16	Type
		C00	0	0	4477	6853	7631	5075	3332	6530	6396	5433	7879	10600	9755	7335	3026	10808	15158	1925	Real
		C01	0	1	30	249	45	8177	1216	115	31	34	37	66	36	37	12	47	91	10	Real
		C10	1	0	11	10	22	12	14	13	14	15	17	30	32	19	177	112	40	3963	Real
		C11	1	1	0	0	3	18	1	1	0	1	0	0	1	2	1	0	3	8	Artifact
	5)) DISTINCT RETICULATIONS
	************************************
	************************************
	No	Ret_cloneA	ret_CloneB	Reticulation	Min Breakpoints	Supernetworks
	6)) Clones sets
	************************************
	************************************
	No	Set of clones	No Supernetworks	Likelihood	Sample likelihood		Prevalences Sample 1	Prevalences Sample 2	Prevalences Sample 3	Prevalences Sample 4	Prevalences Sample 5	Prevalences Sample 6	Prevalences Sample 7	Prevalences Sample 8	Prevalences Sample 9	Prevalences Sample 10	Prevalences Sample 11	Prevalences Sample 12	Prevalences Sample 13	Prevalences Sample 14	Prevalences Sample 15	Prevalences Sample 16
	1	C00000 C00001 C00010 C00100 C01000 C10000	1	-626148	[0.9422 0.9422] [0.006999 0.006999] [0.003114 0.003114] [0.003198 0.003198] [0.02308 0.02308] [0.02137 0.02137]	[0.953 0.953] [1e-08 1e-08] [0.002813 0.002813] [1e-08 1e-08] [1e-08 1e-08] [0.04419 0.04419]	[0.963 0.963] [0.004747 0.004747] [0.003336 0.003336] [0.001494 0.001494] [0.009977 0.009977] [0.01741 0.01741]	[0.2007 0.2007] [0.5377 0.5377] [0.001614 0.001614] [1e-08 1e-08] [0.2381 0.2381] [0.02188 0.02188]	[0.6099 0.6099] [0.1773 0.1773] [1e-08 1e-08] [1e-08 1e-08] [0.2128 0.2128] [1e-08 1e-08]	[0.9479 0.9479] [0.01104 0.01104] [0.00256 0.00256] [0.00149 0.00149] [0.01168 0.01168] [0.02532 0.02532]	[0.9687 0.9687] [0.004383 0.004383] [0.002174 0.002174] [1e-08 1e-08] [0.01065 0.01065] [0.01405 0.01405]	[0.9615 0.9615] [0.004576 0.004576] [0.002875 0.002875] [0.001538 0.001538] [0.009114 0.009114] [0.02044 0.02044]	[0.9491 0.9491] [0.005526 0.005526] [0.003206 0.003206] [0.001746 0.001746] [0.01791 0.01791] [0.02248 0.02248]	[0.7403 0.7403] [0.005311 0.005311] [0.003304 0.003304] [0.001879 0.001879] [0.009815 0.009815] [0.2394 0.2394]	[0.6957 0.6957] [0.004099 0.004099] [0.003944 0.003944] [0.2463 0.2463] [0.01012 0.01012] [0.03977 0.03977]	[0.8951 0.8951] [1e-08 1e-08] [0.002887 0.002887] [1e-08 1e-08] [1e-08 1e-08] [0.102 0.102]	[0.9044 0.9044] [0.003909 0.003909] [0.05579 0.05579] [0.00294 0.00294] [0.009944 0.009944] [0.02298 0.02298]	[0.9565 0.9565] [0.004657 0.004657] [0.009665 0.009665] [0.001397 0.001397] [0.01006 0.01006] [0.01771 0.01771]	[0.9606 0.9606] [0.004731 0.004731] [0.003504 0.003504] [0.001259 0.001259] [0.01139 0.01139] [0.01852 0.01852]	[0.2248 0.2248] [0.003218 0.003218] [0.7384 0.7384] [0.001552 0.001552] [0.01122 0.01122] [0.02088 0.02088]
	7)) SUPERNETSORKS' ESTIMATED PREVALENCES PER HAPLOTYPES
	************************************
	************************************
	Supernetwork	Clones' sets	C00000	C00001	C00010	C00100	C01000	C10000
	SN 1	Setclone 1	[0.9422 0.9422][0.953 0.953][0.963 0.963][0.2007 0.2007][0.6099 0.6099][0.9479 0.9479][0.9687 0.9687][0.9615 0.9615][0.9491 0.9491][0.7403 0.7403][0.6957 0.6957][0.8951 0.8951][0.9044 0.9044][0.9565 0.9565][0.9606 0.9606][0.2248 0.2248][0.006999 0.006999][1e-08 1e-08][0.004747 0.004747][0.5377 0.5377][0.1773 0.1773][0.01104 0.01104][0.004383 0.004383][0.004576 0.004576][0.005526 0.005526][0.00531…

## Sheet: S7
	###################
	SUMMARY
	####################
		Number of Supernetworks :1
		Minimum number of breakpoints :0
		Number of distinct haplotypes : 2
	1)) MUTATIONS
	************************************
	************************************
	No	Mutants	Sample_1	Sample_2	Sample_3	Sample_4	Sample_5	Sample_6	Sample_7	Sample_8	Sample_9	Sample_10	Sample_11	Sample_12	Sample_13	Sample_14	Sample_15	Sample_16	Max Prevalence
	1	S7_808	0.00423478	0.00472836	0.00313703	0.00371729	0.0034831	0.00419865	0.00229989	0.00331097	0.00363369	0.00356625	0.00334352	0.00303745	0.00278741	0.00317315	0.202281	0.0687566	0.202281
	2)) Clusters
	************************************
	************************************
	No	Name	No mutations	No subnetworks
	1	S7_808G	1	1
	3)) DISTINCT HAPLOTYPES
	************************************
	************************************
	No	Short form	Long form	No occurences	Percent Occurencence
	1	C0		1	100
	2	C1	S7_808	1	100
	4)) Haplotypes Tables
	************************************
	************************************
	>S7_808G
		Clones	S7_808	Sample 1	Sample 2	Sample 3	Sample 4	Sample 5	Sample 6	Sample 7	Sample 8	Sample 9	Sample 10	Sample 11	Sample 12	Sample 13	Sample 14	Sample 15	Sample 16	Type
		C0	0	20222	30521	55928	40738	31185	48383	28631	23179	25775	35764	41434	30853	14668	30472	65945	16754	Real
		C1	1	86	145	176	152	109	204	66	77	94	128	139	94	41	97	16722	1237	Real
	5)) DISTINCT RETICULATIONS
	************************************
	************************************
	No	Ret_cloneA	ret_CloneB	Reticulation	Min Breakpoints	Supernetworks
	6)) Clones sets
	************************************
	************************************
	No	Set of clones	No Supernetworks	Likelihood	Sample likelihood		Prevalences Sample 1	Prevalences Sample 2	Prevalences Sample 3	Prevalences Sample 4	Prevalences Sample 5	Prevalences Sample 6	Prevalences Sample 7	Prevalences Sample 8	Prevalences Sample 9	Prevalences Sample 10	Prevalences Sample 11	Prevalences Sample 12	Prevalences Sample 13	Prevalences Sample 14	Prevalences Sample 15	Prevalences Sample 16
	1	C0 C1	1	-113621	[0.9958 0.9958] [0.004235 0.004235]	[0.9953 0.9953] [0.004728 0.004728]	[0.9969 0.9969] [0.003137 0.003137]	[0.9963 0.9963] [0.003717 0.003717]	[0.9965 0.9965] [0.003483 0.003483]	[0.9958 0.9958] [0.004199 0.004199]	[0.9977 0.9977] [0.0023 0.0023]	[0.9967 0.9967] [0.003311 0.003311]	[0.9964 0.9964] [0.003634 0.003634]	[0.9964 0.9964] [0.003566 0.003566]	[0.9967 0.9967] [0.003344 0.003344]	[0.997 0.997] [0.003037 0.003037]	[0.9972 0.9972] [0.002787 0.002787]	[0.9968 0.9968] [0.003173 0.003173]	[0.7977 0.7977] [0.2023 0.2023]	[0.9312 0.9312] [0.06876 0.06876]
	7)) SUPERNETSORKS' ESTIMATED PREVALENCES PER HAPLOTYPES
	************************************
	************************************
	Supernetwork	Clones' sets	C0	C1
	SN 1	Setclone 1	[0.9958 0.9958][0.9953 0.9953][0.9969 0.9969][0.9963 0.9963][0.9965 0.9965][0.9958 0.9958][0.9977 0.9977][0.9967 0.9967][0.9964 0.9964][0.9964 0.9964][0.9967 0.9967][0.997 0.997][0.9972 0.9972][0.9968 0.9968][0.7977 0.7977][0.9312 0.9312][0.004235 0.004235][0.004728 0.004728][0.003137 0.003137][0.003717 0.003717][0.003483 0.003483][0.004199 0.004199][0.0023 0.0023][0.003311 0.003311][0.003634 0.0…

## Sheet: S8
	###################
	SUMMARY
	####################
		Number of Supernetworks :1
		Minimum number of breakpoints :0
		Number of distinct haplotypes : 3
	1)) MUTATIONS
	************************************
	************************************
	No	Mutants	Sample_1	Sample_2	Sample_3	Sample_4	Sample_5	Sample_6	Sample_7	Sample_8	Sample_9	Sample_10	Sample_11	Sample_12	Sample_13	Sample_14	Sample_15	Sample_16	Max Prevalence
	1	S8_84	0.147501	0.22533	0.281448	0.25847	0.239829	0.216898	0.0736548	0.223797	0.160503	0.0986122	0.0778397	0.0895401	0.231137	0.0399453	0.170535	0.0430121	0.281448
	2	S8_87	0.122085	0.205089	0.259841	0.236248	0.215927	0.193406	0.0469098	0.202052	0.138616	0.0706637	0.0534646	0.0642228	0.20878	0.0120286	0.145833	0.0159285	0.259841
	2)) Clusters
	************************************
	************************************
	No	Name	No mutations	No subnetworks
	1	S8_84T	1	1
	2	S8_87T	1	1
	3	S8_84T_87T	2	1
	3)) DISTINCT HAPLOTYPES
	************************************
	************************************
	No	Short form	Long form	No occurences	Percent Occurencence
	1	C00		1	100
	2	C01	S8_87	1	100
	3	C11	S8_84-S8_87	1	100
	4)) Haplotypes Tables
	************************************
	************************************
	>S8_84T
		Clones	S8_84	Sample 1	Sample 2	Sample 3	Sample 4	Sample 5	Sample 6	Sample 7	Sample 8	Sample 9	Sample 10	Sample 11	Sample 12	Sample 13	Sample 14	Sample 15	Sample 16	Type
		C0	0	17229	33599	59938	47802	37259	56641	27493	20151	28150	30722	36062	29203	13818	35811	62117	15530	Real
		C1	1	2981	9773	23477	16662	11755	15688	2186	5810	5382	3361	3044	2872	4154	1490	12771	698	Real
	>S8_87T
		Clones	S8_87	Sample 1	Sample 2	Sample 3	Sample 4	Sample 5	Sample 6	Sample 7	Sample 8	Sample 9	Sample 10	Sample 11	Sample 12	Sample 13	Sample 14	Sample 15	Sample 16	Type
		C0	0	17582	34205	61072	48651	37986	57661	27835	20457	28579	31419	36541	29637	14022	36386	63070	15754	Real
		C1	1	2445	8825	21440	15049	10461	13826	1370	5180	4599	2389	2064	2034	3700	443	10768	255	Real
	>S8_84T_87T
		Clones	S8_84	S8_87	Sample 1	Sample 2	Sample 3	Sample 4	Sample 5	Sample 6	Sample 7	Sample 8	Sample 9	Sample 10	Sample 11	Sample 12	Sample 13	Sample 14	Sample 15	Sample 16	Type
		C00	0	0	16972	33045	58968	47119	36743	55758	27163	19858	27711	30351	35589	28868	13660	35397	61196	15347	Real
		C01	0	1	120	359	682	494	357	586	243	203	296	238	317	247	113	293	660	127	Real
		C10	1	0	204	273	583	414	341	520	144	168	233	334	217	176	93	241	514	86	Artifact
		C11	1	1	2225	8231	20408	14316	9898	12910	1052	4869	4123	2030	1615	1687	3524	19	9811	56	Real
	5)) DISTINCT RETICULATIONS
	************************************
	************************************
	No	Ret_cloneA	ret_CloneB	Reticulation	Min Breakpoints	Supernetworks
	6)) Clones sets
	************************************
	************************************
	No	Set of clones	No Supernetworks	Likelihood	Sample likelihood		Prevalences Sample 1	Prevalences Sample 2	Prevalences Sample 3	Prevalences Sample 4	Prevalences Sample 5	Prevalences Sample 6	Prevalences Sample 7	Prevalences Sample 8	Prevalences Sample 9	Prevalences Sample 10	Prevalences Sample 11	Prevalences Sample 12	Prevalences Sample 13	Prevalences Sample 14	Prevalences Sample 15	Prevalences Sample 16
	1	C00 C01 C11	1	-12800183	[0.9767 0.9767] [1e-08 1e-08] [0.02332 0.02332]	[0.7747 0.7747] [0.02024 0.02024] [0.2051 0.2051]	[1 1] [1e-08 1e-08] [1e-08 1e-08]	[1e-08 1e-08] [0.7587 0.7587] [0.2413 0.2413]	[0.772 0.772] [0.006568 0.006568] [0.2214 0.2214]	[1e-08 1e-08] [0.7992 0.7992] [0.2008 0.2008]	[0.9422 0.9422] [0.006998 0.006998] [0.05084 0.05084]	[0.7868 0.7868] [0.007528 0.007528] [0.2057 0.2057]	[0.8494 0.8494] [0.009281 0.009281] [0.1413 0.1413]	[1 1] [1e-08 1e-08] [1e-08 1e-08]	[1 1] [1e-08 1e-08] [1e-08 1e-08]	[0.9236 0.9236] [0.007036 0.007036] [0.0694 0.0694]	[0.9776 0.9776] [0.02236 0.02236] [1e-08 1e-08]	[0.983 0.983] [1e-08 1e-08] [0.01705 0.01705]	[0.9915 0.9915] [0.008506 0.008506] [1e-08 1e-08]	[0.9741 0.9741] [0.005983 0.005983] [0.01989 0.01989]
	7)) SUPERNETSORKS' ESTIMATED PREVALENCES PER HAPLOTYPES
	************************************
	************************************
	Supernetwork	Clones' sets	C00	C01	C11
	SN 1	Setclone 1	[0.9767 0.9767][0.7747 0.7747][1 1][1e-08 1e-08][0.772 0.772][1e-08 1e-08][0.9422 0.9422][0.7868 0.7868][0.8494 0.8494][1 1][1 1][0.9236 0.9236][0.9776 0.9776][0.983 0.983][0.9915 0.9915][0.9741 0.9741][1e-08 1e-08][0.02024 0.02024][1e-08 1e-08][0.7587 0.7587][0.006568 0.006568][0.7992 0.7992][0.006998 0.006998][0.007528 0.007528][0.009281 0.009281][1e-08 1e-08][1e-08 1e-08][0.007036 0.007036][0.…

## Sheet: ThreeSegmentsExample
	###################
	SUMMARY
	####################
		Number of Supernetworks :51
		Minimum number of breakpoints :2
		Number of distinct haplotypes : 8
	1)) MUTATIONS
	************************************
	************************************
	No	Mutants	Sample_1	Sample_2	Sample_3	Sample_4	Sample_5	Sample_6	Sample_7	Sample_8	Sample_9	Sample_10	Sample_11	Sample_12	Sample_13	Sample_14	Sample_15	Sample_16	Max Prevalence
	1	S2_2037	0.343867	0.144283	0.0807249	0.563369	0.334515	0.194961	0.0661269	0.197497	0.201988	0.13911	0.220195	0.0684826	0.0305292	0.0060245	0.22206	0.0736411	0.563369
	2	S3_201	0.334393	0.0323669	0.154091	0.0477451	0.196914	0.381949	0.0627406	0.169453	0.088772	0.463795	0.348056	0.254907	0.0802367	0.0100735	0.0138873	0.015212	0.463795
	3	S4_709	0.273981	0.345341	0.558908	0.68472	0.617682	0.64865	0.143183	0.482284	0.618325	0.528267	0.815393	0.772674	0.707186	0.900741	0.924315	0.987166	0.987166
	2)) Clusters
	************************************
	************************************
	No	Name	No mutations	No subnetworks
	1	S2_2037A	1	1
	2	S3_201C	1	1
	3	S4_709T	1	1
	3)) DISTINCT HAPLOTYPES
	************************************
	************************************
	No	Short form	Long form	No occurences	Percent Occurencence
	1	C000		51	100
	2	C001	S4_709	51	100
	3	C010	S3_201	46	90.1961
	4	C011	S3_201-S4_709	42	82.3529
	5	C100	S2_2037	29	56.8627
	6	C101	S2_2037-S4_709	51	100
	7	C110	S2_2037-S3_201	22	43.1373
	8	C111	S2_2037-S3_201-S4_709	14	27.451
	4)) Haplotypes Tables
	************************************
	************************************
	>S2_2037A
		Clones	S2_2037	Sample 1	Sample 2	Sample 3	Sample 4	Sample 5	Sample 6	Sample 7	Sample 8	Sample 9	Sample 10	Sample 11	Sample 12	Sample 13	Sample 14	Sample 15	Sample 16	Type
		C0	0	10298	22727	8928	8010	5443	8180	8996	6798	9956	21134	11414	8447	2858	14849	22929	6101	Real
		C1	1	5397	3832	784	10335	2736	1981	637	1673	2520	3415	3223	621	90	90	6545	485	Real
	>S3_201C
		Clones	S3_201	Sample 1	Sample 2	Sample 3	Sample 4	Sample 5	Sample 6	Sample 7	Sample 8	Sample 9	Sample 10	Sample 11	Sample 12	Sample 13	Sample 14	Sample 15	Sample 16	Type
		C0	0	6489	17788	31346	30934	23577	18900	7305	5514	29460	17202	13713	25436	3886	9434	34084	10358	Real
		C1	1	3260	595	5710	1551	5781	11680	489	1125	2870	14879	7321	8702	339	96	480	160	Real
	>S4_709T
		Clones	S4_709	Sample 1	Sample 2	Sample 3	Sample 4	Sample 5	Sample 6	Sample 7	Sample 8	Sample 9	Sample 10	Sample 11	Sample 12	Sample 13	Sample 14	Sample 15	Sample 16	Type
		C0	0	21790	13048	11726	10624	6707	9640	28508	17695	10735	18683	6613	5622	3647	4019	4491	136	Real
		C1	1	8223	6883	14858	23073	10836	17797	4764	16484	17391	20922	29209	19109	8808	36471	54847	10461	Real
	5)) DISTINCT RETICULATIONS
	************************************
	************************************
	No	Ret_cloneA	ret_CloneB	Reticulation	Min Breakpoints	Supernetworks
	1	C001	C100	C101	1	1	3	10	15	17
	2	C001	C010	C011	1	1	2	4	6	19	27	29	30
	3	C011	C100	C101	1	2	11	12	13	14	16	18
	4	C010	C101	C011	1	3	5	7	8	9	21	28	31	32
	5	C000	C101	C001	1	4	5	12	46	47
	6	C010	C101	C001	1	6	7	13
	7	C000	C011	C001	1	8	10	11	24	48	49	50
	8	C011	C101	C001	1	9	14
	9	C000	C011	C010	1	15	16	35	36	37	46	51
	10	C011	C100	C010	1	17	18	38	47
	11	C001	C110	C101	1	19	20	21	22	24	25	44	51
	12	C001	C110	C111	1	20	23	33
	13	C101	C110	C111	1	22	34
	14	C001	C111	C101	1	23	26	45
	15	C000	C111	C001	1	25	26
	16	C000	C101	C100	1	27	28	35	38	48
	17	C010	C101	C100	1	29	31	36	49
	18	C010	C101	C110	1	30	32	33	34	37	50
	19	C011	C101	C111	1	39
	20	C000	C111	C110	1	39	40	41	42	43	44	45
	21	C000	C111	C011	1	40
	22	C000	C110	C010	1	41
	23	C001	C110	C010	1	42
	24	C001	C111	C011	1	43
	6)) Clones sets
	************************************
	************************************
	No	Set of clones	No Supernetworks	Likelihood	Sample likelihood		Prevalences Sample 1	Prevalences Sample 2	Prevalences Sample 3	Prevalences Sample 4	Prevalences Sample 5	Prevalences Sample 6	Prevalences Sample 7	Prevalences Sample 8	Prevalences Sample 9	Prevalences Sample 10	Prevalences Sample 11	Prevalences Sample 12	Prevalences Sample 13	Prevalences Sample 14	Prevalences Sample 15	Prevalences Sample 16
	1	C000 C001 C010 C011 C100 C101	29	-976962	[0.04768 0.3217] [0 0.274] [0.06044 0.3344] [0 0.274] [0.06995 0.3439] [0 0.274]	[0.4779 0.6547] [0.1686 0.3453] [0 0.03237] [0 0.03237] [0 0.1444] [0 0.1444]	[0.2062 0.4411] [0.324 0.5589] [0 0.1541] [0 0.1541] [0 0.08083] [0 0.08083]	[0 0.3153] [0.07346 0.3887] [0 0.04775] [0 0.04775] [0 0.3153] [0.2482 0.5635]	[0 0.3823] [0.08611 0.4684] [0 0.1969] [0 0.1969] [0 0.3346] [0 0.3346]	[0 0.3514] [0.07164 0.423] [0 0.3514] [0.0306 0.3819] [0 0.1951] [0 0.1951]	[0.7279 0.8568] [0.0143 0.1432] [0 0.06277] [0 0.06277] [0 0.06611] [0 0.06611]	[0.1508 0.5177] [0.1153 0.4823] [0 0.1695] [0 0.1695] [0 0.1975] [0 0.1975]	[0.09078 0.3817] [0.3274 0.6183] [0 0.08878] [0 0.08878] [0 0.2021] [0 0.2021]	[0 0.397] [0 0.397] [0 0.4638] [0 0.4638] [0 0.1391] [0 0.1391]	[0 0.1846] [0.2471 0.4317] [0 0.1846] [0.1634 0.348] [0 0.1846] [0.0356 0.2202]	[0 0.2273] [0.4493 0.6766] [0 0.2273] [0.02756 0.2549] [0 0.06853] [0 0.06853]	[0.182 0.2928] [0.5963 0.7072] [0 0.08033] [0 0.08033] [0 0.03052] [0 0.03052]	[0.0832 0.09941] [0.8844 0.9006] [0 0.01019] [0 0.01019] [0 0.00602] [0 0.00602]	[0 0.07579] [0.6881 0.7639] [0 0.01387] [0 0.01387] [0 0.07579] [0.1464 0.2222]	[0 0.01286] [0.8981 0.911] [0 0.01286] [0.002393 0.01525] [0 0.01286] [0.06091 0.07377]
	2	C000 C001 C010 C011 C101 C110	8	-976962	[0.3915 0.5238] [0 0.2646] [0 0.2646] [0 0.1323] [0.009369 0.274] [0.06989 0.3345]	[0.6222 0.6546] [0.1687 0.2334] [0 0.03236] [0 0.03236] [0.112 0.1443] [0 0.03236]	[0.2869 0.441] [0.3241 0.559] [0 0.1541] [0 0.1541] [0 0.08078] [0 0.08078]	[0.2675 0.3152] [0.07358 0.1691] [0 0.04775] [0 0.04775] [0.5157 0.5635] [0 0.04775]	[0.1853 0.3823] [0.08622 0.4801] [0 0.1969] [0 0.1969] [0.1377 0.3346] [0 0.1969]	[0 0.3513] [0.07173 0.618] [0 0.3513] [0.03067 0.382] [0 0.195] [0 0.195]	[0.794 0.8568] [0.01433 0.1399] [0 0.06277] [0 0.06277] [0.003366 0.06614] [0 0.06277]	[0.3482 0.5177] [0.1153 0.4543] [0 0.1695] [0 0.1695] [0.02802 0.1975] [0 0.1695]	[0.2928 0.3816] [0.3275 0.5051] [0 0.08878] [0 0.08878] [0.1133 0.2021] [0 0.08878]	[0.007926 0.4344] [0 0.5283] [0 0.4638] [0 0.4265] [0 0.1391] [0 0.1391]	[0 0.1846] [0.2471 0.6162] [0 0.1846] [0.1635 0.3481] [0.03568 0.2202] [0 0.1846]	[0 0.2273] [0.4493 0.7451] [0 0.2273] [0.02765 0.2549] [0 0.06851] [0 0.06851]	[0.2125 0.2928] [0.5964 0.7072] [0 0.0803] [0 0.0803] [0 0.03052] [0 0.03052]	[0.08921 0.09939] [0.8844 0.9006] [0 0.01018] [0 0.01018] [0 0.006027] [0 0.006027]	[0.06188 0.07575] [0.6882 0.716] [0 0.01387] [0 0.01387] [0.2083 0.2222] [0 0.01387]	[0 0.01283] [0.8982 0.9239] [0 0.01283] [0.002395 0.01523] [0.0609 0.07373] [0 0.01283]
	3	C000 C001 C010 C101 C110 C111	9	-976962	[0.3915 0.6562] [0 0.2647] [0 0.2647] [0.009328 0.274] [0.06983 0.3345] [0 0.2647]	[0.6222 0.6546] [0.2011 0.2335] [0 0.03237] [0.1119 0.1443] [0 0.03237] [0 0.03237]	[0.287 0.3677] [0.4782 0.559] [0.07329 0.1541] [0 0.08077] [0 0.08077] [0 0.08077]	[0.2675 0.3152] [0.1214 0.1691] [0 0.04775] [0.5156 0.5634] [0 0.04775] [0 0.04775]	[0.1853 0.3823] [0.2832 0.4801] [0 0.1969] [0.1376 0.3345] [0 0.1969] [0 0.1969]	[0 0.1645] [0.4536 0.6181] [0.1868 0.3514] [0 0.1645] [0 0.1645] [0.03054 0.1951]	[0.794 0.8568] [0.0771 0.1399] [0 0.06277] [0.003325 0.0661] [0 0.06277] [0 0.06277]	[0.3482 0.5177] [0.2848 0.4543] [0 0.1695] [0.02799 0.1975] [0 0.1695] [0 0.1695]	[0.2929 0.3816] [0.4164 0.5051] [0 0.08875] [0.1132 0.202] [0 0.08875] [0 0.08875]	[0.008047 0.1472] [0.3891 0.5282] [0.3246 0.4638] [0 0.1391] [0 0.1391] [0 0.1391]	[0 0.05689] [0.5951 0.652] [0.1277 0.1846] [0 0.05689] [0 0.05689] [0.1634 0.2203]	[0 0.04106] [0.7041 0.7451] [0.1863 0.2274] [0 0.04106] [0 0.04106] [0.02748 0.06854]	[0.2126 0.2431] [0.6767 0.7072] [0.04972 0.08025] [0 0.03052] [0 0.03052] [0 0.03052]	[0.08932 0.09535] [0.8946 0.9006] [0.004037 0.01007] [0 0.006032] [0 0.006032] [0 0.006032]	[0.06189 0.07576] [0.7021 0.716] [0 0.01387] [0.2082 0.2221] [0 0.01387] [0 0.01387]	[0 0.01285] [0.9134 0.9263] [0 0.01285] [0.0585 0.07135] [0 0.01285] [0.002388 0.01524]
	4	C000 C001 C011 C101 C110 C111	5	-976962	[0.3916 0.6561] [0 0.2646] [0 0.1323] [0.009396 0.1417] [0.06988 0.3345] [0 0.2646]	[0.6222 0.6546] [0.1688 0.2335] [0 0.03237] [0.1119 0.1443] [0 0.03237] [0 0.03237]	[0.3602 0.441] [0.3241 0.4857] [0.07326 0.1541] [0 0.08079] [0 0.08079] [0 0.08079]	[0.2675 0.3152] [0.07367 0.1692] [0 0.04774] [0.5156 0.5634] [0 0.04774] [0 0.04774]	[0.1853 0.3823] [0.08631 0.4801] [0 0.1969] [0.1376 0.3345] [0 0.1969] [0 0.1969]	[0.1563 0.3513] [0.07173 0.4618] [0.1869 0.3819] [0 0.195] [0 0.195] [0 0.195]	[0.794 0.8568] [0.01427 0.1398] [0 0.06279] [0.003322 0.06611] [0 0.06279] [0 0.06279]	[0.3482 0.5177] [0.1152 0.4543] [0 0.1695] [0.02797 0.1975] [0 0.1695] [0 0.1695]	[0.2928 0.3816] [0.3276 0.5052] [0 0.08877] [0.1132 0.202] [0 0.08877] [0 0.08877]	[0.3326 0.4717] [0 0.2036] [0.3247 0.4265] [0 0.1018] [0 0.1391] [0 0.1391]	[0 0.1846] [0.247 0.6519] [0.1278 0.3481] [0 0.2203] [0 0.1846] [0 0.2203]	[0.1588 0.2273] [0.4493 0.5864] [0.1864 0.2549] [0 0.06851] [0 0.06851] [0 0.06851]	[0.2622 0.2928] [0.5965 0.6575] [0.0497 0.08022] [0 0.03053] [0 0.03053] [0 0.03053]	[0.09331 0.09934] [0.8845 0.8966] [0.004046 0.01008] [0 0.006031] [0 0.006031] [0 0.006031]	[0.06186 0.07576] [0.6883 0.716] [0 0.01389] [0.2082 0.2221] [0 0.01389] [0 0.01389]	[0 0.01285] [0.8982 0.9263] [0 0.01525] [0.05843 0.07368] [0 0.01285] [0 0.01525]
	7)) SUPERNETSORKS' ESTIMATED PREVALENCES PER HAPLOTYPES
	************************************
	************************************
	Supernetwork	Clones' sets	C000	C001	C010	C011	C100	C101	C110	C111
	SN 1	Setclone 4	[0.3916 0.6561][0.6222 0.6546][0.3602 0.441][0.2675 0.3152][0.1853 0.3823][0.1563 0.3513][0.794 0.8568][0.3482 0.5177][0.2928 0.3816][0.3326 0.4717][0 0.1846][0.1588 0.2273][0.2622 0.2928][0.09331 0.09934][0.06186 0.07576][0 0.01285][0 0.2646][0.1688 0.2335][0.3241 0.4857][0.07367 0.1692][0.08631 0.4801][0.07173 0.4618][0.01427 0.1398][0.1152 0.4543][0.3276 0.5052][0 0.2036][0.247 0.6519][0.4493 …
	SN 2	Setclone 4	[0.3916 0.6561][0.6222 0.6546][0.3602 0.441][0.2675 0.3152][0.1853 0.3823][0.1563 0.3513][0.794 0.8568][0.3482 0.5177][0.2928 0.3816][0.3326 0.4717][0 0.1846][0.1588 0.2273][0.2622 0.2928][0.09331 0.09934][0.06186 0.07576][0 0.01285][0 0.2646][0.1688 0.2335][0.3241 0.4857][0.07367 0.1692][0.08631 0.4801][0.07173 0.4618][0.01427 0.1398][0.1152 0.4543][0.3276 0.5052][0 0.2036][0.247 0.6519][0.4493 …
	SN 3	Setclone 4	[0.3916 0.6561][0.6222 0.6546][0.3602 0.441][0.2675 0.3152][0.1853 0.3823][0.1563 0.3513][0.794 0.8568][0.3482 0.5177][0.2928 0.3816][0.3326 0.4717][0 0.1846][0.1588 0.2273][0.2622 0.2928][0.09331 0.09934][0.06186 0.07576][0 0.01285][0 0.2646][0.1688 0.2335][0.3241 0.4857][0.07367 0.1692][0.08631 0.4801][0.07173 0.4618][0.01427 0.1398][0.1152 0.4543][0.3276 0.5052][0 0.2036][0.247 0.6519][0.4493 …
	SN 4	Setclone 4	[0.3916 0.6561][0.6222 0.6546][0.3602 0.441][0.2675 0.3152][0.1853 0.3823][0.1563 0.3513][0.794 0.8568][0.3482 0.5177][0.2928 0.3816][0.3326 0.4717][0 0.1846][0.1588 0.2273][0.2622 0.2928][0.09331 0.09934][0.06186 0.07576][0 0.01285][0 0.2646][0.1688 0.2335][0.3241 0.4857][0.07367 0.1692][0.08631 0.4801][0.07173 0.4618][0.01427 0.1398][0.1152 0.4543][0.3276 0.5052][0 0.2036][0.247 0.6519][0.4493 …
	SN 5	Setclone 4	[0.3916 0.6561][0.6222 0.6546][0.3602 0.441][0.2675 0.3152][0.1853 0.3823][0.1563 0.3513][0.794 0.8568][0.3482 0.5177][0.2928 0.3816][0.3326 0.4717][0 0.1846][0.1588 0.2273][0.2622 0.2928][0.09331 0.09934][0.06186 0.07576][0 0.01285][0 0.2646][0.1688 0.2335][0.3241 0.4857][0.07367 0.1692][0.08631 0.4801][0.07173 0.4618][0.01427 0.1398][0.1152 0.4543][0.3276 0.5052][0 0.2036][0.247 0.6519][0.4493 …
	SN 6	Setclone 3	[0.3915 0.6562][0.6222 0.6546][0.287 0.3677][0.2675 0.3152][0.1853 0.3823][0 0.1645][0.794 0.8568][0.3482 0.5177][0.2929 0.3816][0.008047 0.1472][0 0.05689][0 0.04106][0.2126 0.2431][0.08932 0.09535][0.06189 0.07576][0 0.01285][0 0.2647][0.2011 0.2335][0.4782 0.559][0.1214 0.1691][0.2832 0.4801][0.4536 0.6181][0.0771 0.1399][0.2848 0.4543][0.4164 0.5051][0.3891 0.5282][0.5951 0.652][0.7041 0.7451…
	SN 7	Setclone 3	[0.3915 0.6562][0.6222 0.6546][0.287 0.3677][0.2675 0.3152][0.1853 0.3823][0 0.1645][0.794 0.8568][0.3482 0.5177][0.2929 0.3816][0.008047 0.1472][0 0.05689][0 0.04106][0.2126 0.2431][0.08932 0.09535][0.06189 0.07576][0 0.01285][0 0.2647][0.2011 0.2335][0.4782 0.559][0.1214 0.1691][0.2832 0.4801][0.4536 0.6181][0.0771 0.1399][0.2848 0.4543][0.4164 0.5051][0.3891 0.5282][0.5951 0.652][0.7041 0.7451…
	SN 8	Setclone 3	[0.3915 0.6562][0.6222 0.6546][0.287 0.3677][0.2675 0.3152][0.1853 0.3823][0 0.1645][0.794 0.8568][0.3482 0.5177][0.2929 0.3816][0.008047 0.1472][0 0.05689][0 0.04106][0.2126 0.2431][0.08932 0.09535][0.06189 0.07576][0 0.01285][0 0.2647][0.2011 0.2335][0.4782 0.559][0.1214 0.1691][0.2832 0.4801][0.4536 0.6181][0.0771 0.1399][0.2848 0.4543][0.4164 0.5051][0.3891 0.5282][0.5951 0.652][0.7041 0.7451…
	SN 9	Setclone 3	[0.3915 0.6562][0.6222 0.6546][0.287 0.3677][0.2675 0.3152][0.1853 0.3823][0 0.1645][0.794 0.8568][0.3482 0.5177][0.2929 0.3816][0.008047 0.1472][0 0.05689][0 0.04106][0.2126 0.2431][0.08932 0.09535][0.06189 0.07576][0 0.01285][0 0.2647][0.2011 0.2335][0.4782 0.559][0.1214 0.1691][0.2832 0.4801][0.4536 0.6181][0.0771 0.1399][0.2848 0.4543][0.4164 0.5051][0.3891 0.5282][0.5951 0.652][0.7041 0.7451…
	SN 10	Setclone 3	[0.3915 0.6562][0.6222 0.6546][0.287 0.3677][0.2675 0.3152][0.1853 0.3823][0 0.1645][0.794 0.8568][0.3482 0.5177][0.2929 0.3816][0.008047 0.1472][0 0.05689][0 0.04106][0.2126 0.2431][0.08932 0.09535][0.06189 0.07576][0 0.01285][0 0.2647][0.2011 0.2335][0.4782 0.559][0.1214 0.1691][0.2832 0.4801][0.4536 0.6181][0.0771 0.1399][0.2848 0.4543][0.4164 0.5051][0.3891 0.5282][0.5951 0.652][0.7041 0.7451…
	SN 11	Setclone 3	[0.3915 0.6562][0.6222 0.6546][0.287 0.3677][0.2675 0.3152][0.1853 0.3823][0 0.1645][0.794 0.8568][0.3482 0.5177][0.2929 0.3816][0.008047 0.1472][0 0.05689][0 0.04106][0.2126 0.2431][0.08932 0.09535][0.06189 0.07576][0 0.01285][0 0.2647][0.2011 0.2335][0.4782 0.559][0.1214 0.1691][0.2832 0.4801][0.4536 0.6181][0.0771 0.1399][0.2848 0.4543][0.4164 0.5051][0.3891 0.5282][0.5951 0.652][0.7041 0.7451…
	SN 12	Setclone 3	[0.3915 0.6562][0.6222 0.6546][0.287 0.3677][0.2675 0.3152][0.1853 0.3823][0 0.1645][0.794 0.8568][0.3482 0.5177][0.2929 0.3816][0.008047 0.1472][0 0.05689][0 0.04106][0.2126 0.2431][0.08932 0.09535][0.06189 0.07576][0 0.01285][0 0.2647][0.2011 0.2335][0.4782 0.559][0.1214 0.1691][0.2832 0.4801][0.4536 0.6181][0.0771 0.1399][0.2848 0.4543][0.4164 0.5051][0.3891 0.5282][0.5951 0.652][0.7041 0.7451…
	SN 13	Setclone 3	[0.3915 0.6562][0.6222 0.6546][0.287 0.3677][0.2675 0.3152][0.1853 0.3823][0 0.1645][0.794 0.8568][0.3482 0.5177][0.2929 0.3816][0.008047 0.1472][0 0.05689][0 0.04106][0.2126 0.2431][0.08932 0.09535][0.06189 0.07576][0 0.01285][0 0.2647][0.2011 0.2335][0.4782 0.559][0.1214 0.1691][0.2832 0.4801][0.4536 0.6181][0.0771 0.1399][0.2848 0.4543][0.4164 0.5051][0.3891 0.5282][0.5951 0.652][0.7041 0.7451…
	SN 14	Setclone 3	[0.3915 0.6562][0.6222 0.6546][0.287 0.3677][0.2675 0.3152][0.1853 0.3823][0 0.1645][0.794 0.8568][0.3482 0.5177][0.2929 0.3816][0.008047 0.1472][0 0.05689][0 0.04106][0.2126 0.2431][0.08932 0.09535][0.06189 0.07576][0 0.01285][0 0.2647][0.2011 0.2335][0.4782 0.559][0.1214 0.1691][0.2832 0.4801][0.4536 0.6181][0.0771 0.1399][0.2848 0.4543][0.4164 0.5051][0.3891 0.5282][0.5951 0.652][0.7041 0.7451…
	SN 15	Setclone 2	[0.3915 0.5238][0.6222 0.6546][0.2869 0.441][0.2675 0.3152][0.1853 0.3823][0 0.3513][0.794 0.8568][0.3482 0.5177][0.2928 0.3816][0.007926 0.4344][0 0.1846][0 0.2273][0.2125 0.2928][0.08921 0.09939][0.06188 0.07575][0 0.01283][0 0.2646][0.1687 0.2334][0.3241 0.559][0.07358 0.1691][0.08622 0.4801][0.07173 0.618][0.01433 0.1399][0.1153 0.4543][0.3275 0.5051][0 0.5283][0.2471 0.6162][0.4493 0.7451][0…
	SN 16	Setclone 2	[0.3915 0.5238][0.6222 0.6546][0.2869 0.441][0.2675 0.3152][0.1853 0.3823][0 0.3513][0.794 0.8568][0.3482 0.5177][0.2928 0.3816][0.007926 0.4344][0 0.1846][0 0.2273][0.2125 0.2928][0.08921 0.09939][0.06188 0.07575][0 0.01283][0 0.2646][0.1687 0.2334][0.3241 0.559][0.07358 0.1691][0.08622 0.4801][0.07173 0.618][0.01433 0.1399][0.1153 0.4543][0.3275 0.5051][0 0.5283][0.2471 0.6162][0.4493 0.7451][0…
	SN 17	Setclone 2	[0.3915 0.5238][0.6222 0.6546][0.2869 0.441][0.2675 0.3152][0.1853 0.3823][0 0.3513][0.794 0.8568][0.3482 0.5177][0.2928 0.3816][0.007926 0.4344][0 0.1846][0 0.2273][0.2125 0.2928][0.08921 0.09939][0.06188 0.07575][0 0.01283][0 0.2646][0.1687 0.2334][0.3241 0.559][0.07358 0.1691][0.08622 0.4801][0.07173 0.618][0.01433 0.1399][0.1153 0.4543][0.3275 0.5051][0 0.5283][0.2471 0.6162][0.4493 0.7451][0…
	SN 18	Setclone 2	[0.3915 0.5238][0.6222 0.6546][0.2869 0.441][0.2675 0.3152][0.1853 0.3823][0 0.3513][0.794 0.8568][0.3482 0.5177][0.2928 0.3816][0.007926 0.4344][0 0.1846][0 0.2273][0.2125 0.2928][0.08921 0.09939][0.06188 0.07575][0 0.01283][0 0.2646][0.1687 0.2334][0.3241 0.559][0.07358 0.1691][0.08622 0.4801][0.07173 0.618][0.01433 0.1399][0.1153 0.4543][0.3275 0.5051][0 0.5283][0.2471 0.6162][0.4493 0.7451][0…
	SN 19	Setclone 2	[0.3915 0.5238][0.6222 0.6546][0.2869 0.441][0.2675 0.3152][0.1853 0.3823][0 0.3513][0.794 0.8568][0.3482 0.5177][0.2928 0.3816][0.007926 0.4344][0 0.1846][0 0.2273][0.2125 0.2928][0.08921 0.09939][0.06188 0.07575][0 0.01283][0 0.2646][0.1687 0.2334][0.3241 0.559][0.07358 0.1691][0.08622 0.4801][0.07173 0.618][0.01433 0.1399][0.1153 0.4543][0.3275 0.5051][0 0.5283][0.2471 0.6162][0.4493 0.7451][0…
	SN 20	Setclone 2	[0.3915 0.5238][0.6222 0.6546][0.2869 0.441][0.2675 0.3152][0.1853 0.3823][0 0.3513][0.794 0.8568][0.3482 0.5177][0.2928 0.3816][0.007926 0.4344][0 0.1846][0 0.2273][0.2125 0.2928][0.08921 0.09939][0.06188 0.07575][0 0.01283][0 0.2646][0.1687 0.2334][0.3241 0.559][0.07358 0.1691][0.08622 0.4801][0.07173 0.618][0.01433 0.1399][0.1153 0.4543][0.3275 0.5051][0 0.5283][0.2471 0.6162][0.4493 0.7451][0…
	SN 21	Setclone 2	[0.3915 0.5238][0.6222 0.6546][0.2869 0.441][0.2675 0.3152][0.1853 0.3823][0 0.3513][0.794 0.8568][0.3482 0.5177][0.2928 0.3816][0.007926 0.4344][0 0.1846][0 0.2273][0.2125 0.2928][0.08921 0.09939][0.06188 0.07575][0 0.01283][0 0.2646][0.1687 0.2334][0.3241 0.559][0.07358 0.1691][0.08622 0.4801][0.07173 0.618][0.01433 0.1399][0.1153 0.4543][0.3275 0.5051][0 0.5283][0.2471 0.6162][0.4493 0.7451][0…
	SN 22	Setclone 2	[0.3915 0.5238][0.6222 0.6546][0.2869 0.441][0.2675 0.3152][0.1853 0.3823][0 0.3513][0.794 0.8568][0.3482 0.5177][0.2928 0.3816][0.007926 0.4344][0 0.1846][0 0.2273][0.2125 0.2928][0.08921 0.09939][0.06188 0.07575][0 0.01283][0 0.2646][0.1687 0.2334][0.3241 0.559][0.07358 0.1691][0.08622 0.4801][0.07173 0.618][0.01433 0.1399][0.1153 0.4543][0.3275 0.5051][0 0.5283][0.2471 0.6162][0.4493 0.7451][0…
	SN 23	Setclone 1	[0.04768 0.3217][0.4779 0.6547][0.2062 0.4411][0 0.3153][0 0.3823][0 0.3514][0.7279 0.8568][0.1508 0.5177][0.09078 0.3817][0 0.397][0 0.1846][0 0.2273][0.182 0.2928][0.0832 0.09941][0 0.07579][0 0.01286][0 0.274][0.1686 0.3453][0.324 0.5589][0.07346 0.3887][0.08611 0.4684][0.07164 0.423][0.0143 0.1432][0.1153 0.4823][0.3274 0.6183][0 0.397][0.2471 0.4317][0.4493 0.6766][0.5963 0.7072][0.8844 0.90…
	SN 24	Setclone 1	[0.04768 0.3217][0.4779 0.6547][0.2062 0.4411][0 0.3153][0 0.3823][0 0.3514][0.7279 0.8568][0.1508 0.5177][0.09078 0.3817][0 0.397][0 0.1846][0 0.2273][0.182 0.2928][0.0832 0.09941][0 0.07579][0 0.01286][0 0.274][0.1686 0.3453][0.324 0.5589][0.07346 0.3887][0.08611 0.4684][0.07164 0.423][0.0143 0.1432][0.1153 0.4823][0.3274 0.6183][0 0.397][0.2471 0.4317][0.4493 0.6766][0.5963 0.7072][0.8844 0.90…
	SN 25	Setclone 1	[0.04768 0.3217][0.4779 0.6547][0.2062 0.4411][0 0.3153][0 0.3823][0 0.3514][0.7279 0.8568][0.1508 0.5177][0.09078 0.3817][0 0.397][0 0.1846][0 0.2273][0.182 0.2928][0.0832 0.09941][0 0.07579][0 0.01286][0 0.274][0.1686 0.3453][0.324 0.5589][0.07346 0.3887][0.08611 0.4684][0.07164 0.423][0.0143 0.1432][0.1153 0.4823][0.3274 0.6183][0 0.397][0.2471 0.4317][0.4493 0.6766][0.5963 0.7072][0.8844 0.90…
	SN 26	Setclone 1	[0.04768 0.3217][0.4779 0.6547][0.2062 0.4411][0 0.3153][0 0.3823][0 0.3514][0.7279 0.8568][0.1508 0.5177][0.09078 0.3817][0 0.397][0 0.1846][0 0.2273][0.182 0.2928][0.0832 0.09941][0 0.07579][0 0.01286][0 0.274][0.1686 0.3453][0.324 0.5589][0.07346 0.3887][0.08611 0.4684][0.07164 0.423][0.0143 0.1432][0.1153 0.4823][0.3274 0.6183][0 0.397][0.2471 0.4317][0.4493 0.6766][0.5963 0.7072][0.8844 0.90…
	SN 27	Setclone 1	[0.04768 0.3217][0.4779 0.6547][0.2062 0.4411][0 0.3153][0 0.3823][0 0.3514][0.7279 0.8568][0.1508 0.5177][0.09078 0.3817][0 0.397][0 0.1846][0 0.2273][0.182 0.2928][0.0832 0.09941][0 0.07579][0 0.01286][0 0.274][0.1686 0.3453][0.324 0.5589][0.07346 0.3887][0.08611 0.4684][0.07164 0.423][0.0143 0.1432][0.1153 0.4823][0.3274 0.6183][0 0.397][0.2471 0.4317][0.4493 0.6766][0.5963 0.7072][0.8844 0.90…
	SN 28	Setclone 1	[0.04768 0.3217][0.4779 0.6547][0.2062 0.4411][0 0.3153][0 0.3823][0 0.3514][0.7279 0.8568][0.1508 0.5177][0.09078 0.3817][0 0.397][0 0.1846][0 0.2273][0.182 0.2928][0.0832 0.09941][0 0.07579][0 0.01286][0 0.274][0.1686 0.3453][0.324 0.5589][0.07346 0.3887][0.08611 0.4684][0.07164 0.423][0.0143 0.1432][0.1153 0.4823][0.3274 0.6183][0 0.397][0.2471 0.4317][0.4493 0.6766][0.5963 0.7072][0.8844 0.90…
	SN 29	Setclone 1	[0.04768 0.3217][0.4779 0.6547][0.2062 0.4411][0 0.3153][0 0.3823][0 0.3514][0.7279 0.8568][0.1508 0.5177][0.09078 0.3817][0 0.397][0 0.1846][0 0.2273][0.182 0.2928][0.0832 0.09941][0 0.07579][0 0.01286][0 0.274][0.1686 0.3453][0.324 0.5589][0.07346 0.3887][0.08611 0.4684][0.07164 0.423][0.0143 0.1432][0.1153 0.4823][0.3274 0.6183][0 0.397][0.2471 0.4317][0.4493 0.6766][0.5963 0.7072][0.8844 0.90…
	SN 30	Setclone 1	[0.04768 0.3217][0.4779 0.6547][0.2062 0.4411][0 0.3153][0 0.3823][0 0.3514][0.7279 0.8568][0.1508 0.5177][0.09078 0.3817][0 0.397][0 0.1846][0 0.2273][0.182 0.2928][0.0832 0.09941][0 0.07579][0 0.01286][0 0.274][0.1686 0.3453][0.324 0.5589][0.07346 0.3887][0.08611 0.4684][0.07164 0.423][0.0143 0.1432][0.1153 0.4823][0.3274 0.6183][0 0.397][0.2471 0.4317][0.4493 0.6766][0.5963 0.7072][0.8844 0.90…
	SN 31	Setclone 1	[0.04768 0.3217][0.4779 0.6547][0.2062 0.4411][0 0.3153][0 0.3823][0 0.3514][0.7279 0.8568][0.1508 0.5177][0.09078 0.3817][0 0.397][0 0.1846][0 0.2273][0.182 0.2928][0.0832 0.09941][0 0.07579][0 0.01286][0 0.274][0.1686 0.3453][0.324 0.5589][0.07346 0.3887][0.08611 0.4684][0.07164 0.423][0.0143 0.1432][0.1153 0.4823][0.3274 0.6183][0 0.397][0.2471 0.4317][0.4493 0.6766][0.5963 0.7072][0.8844 0.90…
	SN 32	Setclone 1	[0.04768 0.3217][0.4779 0.6547][0.2062 0.4411][0 0.3153][0 0.3823][0 0.3514][0.7279 0.8568][0.1508 0.5177][0.09078 0.3817][0 0.397][0 0.1846][0 0.2273][0.182 0.2928][0.0832 0.09941][0 0.07579][0 0.01286][0 0.274][0.1686 0.3453][0.324 0.5589][0.07346 0.3887][0.08611 0.4684][0.07164 0.423][0.0143 0.1432][0.1153 0.4823][0.3274 0.6183][0 0.397][0.2471 0.4317][0.4493 0.6766][0.5963 0.7072][0.8844 0.90…
	SN 33	Setclone 1	[0.04768 0.3217][0.4779 0.6547][0.2062 0.4411][0 0.3153][0 0.3823][0 0.3514][0.7279 0.8568][0.1508 0.5177][0.09078 0.3817][0 0.397][0 0.1846][0 0.2273][0.182 0.2928][0.0832 0.09941][0 0.07579][0 0.01286][0 0.274][0.1686 0.3453][0.324 0.5589][0.07346 0.3887][0.08611 0.4684][0.07164 0.423][0.0143 0.1432][0.1153 0.4823][0.3274 0.6183][0 0.397][0.2471 0.4317][0.4493 0.6766][0.5963 0.7072][0.8844 0.90…
	SN 34	Setclone 1	[0.04768 0.3217][0.4779 0.6547][0.2062 0.4411][0 0.3153][0 0.3823][0 0.3514][0.7279 0.8568][0.1508 0.5177][0.09078 0.3817][0 0.397][0 0.1846][0 0.2273][0.182 0.2928][0.0832 0.09941][0 0.07579][0 0.01286][0 0.274][0.1686 0.3453][0.324 0.5589][0.07346 0.3887][0.08611 0.4684][0.07164 0.423][0.0143 0.1432][0.1153 0.4823][0.3274 0.6183][0 0.397][0.2471 0.4317][0.4493 0.6766][0.5963 0.7072][0.8844 0.90…
	SN 35	Setclone 1	[0.04768 0.3217][0.4779 0.6547][0.2062 0.4411][0 0.3153][0 0.3823][0 0.3514][0.7279 0.8568][0.1508 0.5177][0.09078 0.3817][0 0.397][0 0.1846][0 0.2273][0.182 0.2928][0.0832 0.09941][0 0.07579][0 0.01286][0 0.274][0.1686 0.3453][0.324 0.5589][0.07346 0.3887][0.08611 0.4684][0.07164 0.423][0.0143 0.1432][0.1153 0.4823][0.3274 0.6183][0 0.397][0.2471 0.4317][0.4493 0.6766][0.5963 0.7072][0.8844 0.90…
	SN 36	Setclone 1	[0.04768 0.3217][0.4779 0.6547][0.2062 0.4411][0 0.3153][0 0.3823][0 0.3514][0.7279 0.8568][0.1508 0.5177][0.09078 0.3817][0 0.397][0 0.1846][0 0.2273][0.182 0.2928][0.0832 0.09941][0 0.07579][0 0.01286][0 0.274][0.1686 0.3453][0.324 0.5589][0.07346 0.3887][0.08611 0.4684][0.07164 0.423][0.0143 0.1432][0.1153 0.4823][0.3274 0.6183][0 0.397][0.2471 0.4317][0.4493 0.6766][0.5963 0.7072][0.8844 0.90…
	SN 37	Setclone 1	[0.04768 0.3217][0.4779 0.6547][0.2062 0.4411][0 0.3153][0 0.3823][0 0.3514][0.7279 0.8568][0.1508 0.5177][0.09078 0.3817][0 0.397][0 0.1846][0 0.2273][0.182 0.2928][0.0832 0.09941][0 0.07579][0 0.01286][0 0.274][0.1686 0.3453][0.324 0.5589][0.07346 0.3887][0.08611 0.4684][0.07164 0.423][0.0143 0.1432][0.1153 0.4823][0.3274 0.6183][0 0.397][0.2471 0.4317][0.4493 0.6766][0.5963 0.7072][0.8844 0.90…
	SN 38	Setclone 1	[0.04768 0.3217][0.4779 0.6547][0.2062 0.4411][0 0.3153][0 0.3823][0 0.3514][0.7279 0.8568][0.1508 0.5177][0.09078 0.3817][0 0.397][0 0.1846][0 0.2273][0.182 0.2928][0.0832 0.09941][0 0.07579][0 0.01286][0 0.274][0.1686 0.3453][0.324 0.5589][0.07346 0.3887][0.08611 0.4684][0.07164 0.423][0.0143 0.1432][0.1153 0.4823][0.3274 0.6183][0 0.397][0.2471 0.4317][0.4493 0.6766][0.5963 0.7072][0.8844 0.90…
	SN 39	Setclone 1	[0.04768 0.3217][0.4779 0.6547][0.2062 0.4411][0 0.3153][0 0.3823][0 0.3514][0.7279 0.8568][0.1508 0.5177][0.09078 0.3817][0 0.397][0 0.1846][0 0.2273][0.182 0.2928][0.0832 0.09941][0 0.07579][0 0.01286][0 0.274][0.1686 0.3453][0.324 0.5589][0.07346 0.3887][0.08611 0.4684][0.07164 0.423][0.0143 0.1432][0.1153 0.4823][0.3274 0.6183][0 0.397][0.2471 0.4317][0.4493 0.6766][0.5963 0.7072][0.8844 0.90…
	SN 40	Setclone 1	[0.04768 0.3217][0.4779 0.6547][0.2062 0.4411][0 0.3153][0 0.3823][0 0.3514][0.7279 0.8568][0.1508 0.5177][0.09078 0.3817][0 0.397][0 0.1846][0 0.2273][0.182 0.2928][0.0832 0.09941][0 0.07579][0 0.01286][0 0.274][0.1686 0.3453][0.324 0.5589][0.07346 0.3887][0.08611 0.4684][0.07164 0.423][0.0143 0.1432][0.1153 0.4823][0.3274 0.6183][0 0.397][0.2471 0.4317][0.4493 0.6766][0.5963 0.7072][0.8844 0.90…
	SN 41	Setclone 1	[0.04768 0.3217][0.4779 0.6547][0.2062 0.4411][0 0.3153][0 0.3823][0 0.3514][0.7279 0.8568][0.1508 0.5177][0.09078 0.3817][0 0.397][0 0.1846][0 0.2273][0.182 0.2928][0.0832 0.09941][0 0.07579][0 0.01286][0 0.274][0.1686 0.3453][0.324 0.5589][0.07346 0.3887][0.08611 0.4684][0.07164 0.423][0.0143 0.1432][0.1153 0.4823][0.3274 0.6183][0 0.397][0.2471 0.4317][0.4493 0.6766][0.5963 0.7072][0.8844 0.90…
	SN 42	Setclone 1	[0.04768 0.3217][0.4779 0.6547][0.2062 0.4411][0 0.3153][0 0.3823][0 0.3514][0.7279 0.8568][0.1508 0.5177][0.09078 0.3817][0 0.397][0 0.1846][0 0.2273][0.182 0.2928][0.0832 0.09941][0 0.07579][0 0.01286][0 0.274][0.1686 0.3453][0.324 0.5589][0.07346 0.3887][0.08611 0.4684][0.07164 0.423][0.0143 0.1432][0.1153 0.4823][0.3274 0.6183][0 0.397][0.2471 0.4317][0.4493 0.6766][0.5963 0.7072][0.8844 0.90…
	SN 43	Setclone 1	[0.04768 0.3217][0.4779 0.6547][0.2062 0.4411][0 0.3153][0 0.3823][0 0.3514][0.7279 0.8568][0.1508 0.5177][0.09078 0.3817][0 0.397][0 0.1846][0 0.2273][0.182 0.2928][0.0832 0.09941][0 0.07579][0 0.01286][0 0.274][0.1686 0.3453][0.324 0.5589][0.07346 0.3887][0.08611 0.4684][0.07164 0.423][0.0143 0.1432][0.1153 0.4823][0.3274 0.6183][0 0.397][0.2471 0.4317][0.4493 0.6766][0.5963 0.7072][0.8844 0.90…
	SN 44	Setclone 1	[0.04768 0.3217][0.4779 0.6547][0.2062 0.4411][0 0.3153][0 0.3823][0 0.3514][0.7279 0.8568][0.1508 0.5177][0.09078 0.3817][0 0.397][0 0.1846][0 0.2273][0.182 0.2928][0.0832 0.09941][0 0.07579][0 0.01286][0 0.274][0.1686 0.3453][0.324 0.5589][0.07346 0.3887][0.08611 0.4684][0.07164 0.423][0.0143 0.1432][0.1153 0.4823][0.3274 0.6183][0 0.397][0.2471 0.4317][0.4493 0.6766][0.5963 0.7072][0.8844 0.90…
	SN 45	Setclone 1	[0.04768 0.3217][0.4779 0.6547][0.2062 0.4411][0 0.3153][0 0.3823][0 0.3514][0.7279 0.8568][0.1508 0.5177][0.09078 0.3817][0 0.397][0 0.1846][0 0.2273][0.182 0.2928][0.0832 0.09941][0 0.07579][0 0.01286][0 0.274][0.1686 0.3453][0.324 0.5589][0.07346 0.3887][0.08611 0.4684][0.07164 0.423][0.0143 0.1432][0.1153 0.4823][0.3274 0.6183][0 0.397][0.2471 0.4317][0.4493 0.6766][0.5963 0.7072][0.8844 0.90…
	SN 46	Setclone 1	[0.04768 0.3217][0.4779 0.6547][0.2062 0.4411][0 0.3153][0 0.3823][0 0.3514][0.7279 0.8568][0.1508 0.5177][0.09078 0.3817][0 0.397][0 0.1846][0 0.2273][0.182 0.2928][0.0832 0.09941][0 0.07579][0 0.01286][0 0.274][0.1686 0.3453][0.324 0.5589][0.07346 0.3887][0.08611 0.4684][0.07164 0.423][0.0143 0.1432][0.1153 0.4823][0.3274 0.6183][0 0.397][0.2471 0.4317][0.4493 0.6766][0.5963 0.7072][0.8844 0.90…
	SN 47	Setclone 1	[0.04768 0.3217][0.4779 0.6547][0.2062 0.4411][0 0.3153][0 0.3823][0 0.3514][0.7279 0.8568][0.1508 0.5177][0.09078 0.3817][0 0.397][0 0.1846][0 0.2273][0.182 0.2928][0.0832 0.09941][0 0.07579][0 0.01286][0 0.274][0.1686 0.3453][0.324 0.5589][0.07346 0.3887][0.08611 0.4684][0.07164 0.423][0.0143 0.1432][0.1153 0.4823][0.3274 0.6183][0 0.397][0.2471 0.4317][0.4493 0.6766][0.5963 0.7072][0.8844 0.90…
	SN 48	Setclone 1	[0.04768 0.3217][0.4779 0.6547][0.2062 0.4411][0 0.3153][0 0.3823][0 0.3514][0.7279 0.8568][0.1508 0.5177][0.09078 0.3817][0 0.397][0 0.1846][0 0.2273][0.182 0.2928][0.0832 0.09941][0 0.07579][0 0.01286][0 0.274][0.1686 0.3453][0.324 0.5589][0.07346 0.3887][0.08611 0.4684][0.07164 0.423][0.0143 0.1432][0.1153 0.4823][0.3274 0.6183][0 0.397][0.2471 0.4317][0.4493 0.6766][0.5963 0.7072][0.8844 0.90…
	SN 49	Setclone 1	[0.04768 0.3217][0.4779 0.6547][0.2062 0.4411][0 0.3153][0 0.3823][0 0.3514][0.7279 0.8568][0.1508 0.5177][0.09078 0.3817][0 0.397][0 0.1846][0 0.2273][0.182 0.2928][0.0832 0.09941][0 0.07579][0 0.01286][0 0.274][0.1686 0.3453][0.324 0.5589][0.07346 0.3887][0.08611 0.4684][0.07164 0.423][0.0143 0.1432][0.1153 0.4823][0.3274 0.6183][0 0.397][0.2471 0.4317][0.4493 0.6766][0.5963 0.7072][0.8844 0.90…
	SN 50	Setclone 1	[0.04768 0.3217][0.4779 0.6547][0.2062 0.4411][0 0.3153][0 0.3823][0 0.3514][0.7279 0.8568][0.1508 0.5177][0.09078 0.3817][0 0.397][0 0.1846][0 0.2273][0.182 0.2928][0.0832 0.09941][0 0.07579][0 0.01286][0 0.274][0.1686 0.3453][0.324 0.5589][0.07346 0.3887][0.08611 0.4684][0.07164 0.423][0.0143 0.1432][0.1153 0.4823][0.3274 0.6183][0 0.397][0.2471 0.4317][0.4493 0.6766][0.5963 0.7072][0.8844 0.90…
	SN 51	Setclone 1	[0.04768 0.3217][0.4779 0.6547][0.2062 0.4411][0 0.3153][0 0.3823][0 0.3514][0.7279 0.8568][0.1508 0.5177][0.09078 0.3817][0 0.397][0 0.1846][0 0.2273][0.182 0.2928][0.0832 0.09941][0 0.07579][0 0.01286][0 0.274][0.1686 0.3453][0.324 0.5589][0.07346 0.3887][0.08611 0.4684][0.07164 0.423][0.0143 0.1432][0.1153 0.4823][0.3274 0.6183][0 0.397][0.2471 0.4317][0.4493 0.6766][0.5963 0.7072][0.8844 0.90…
